# Supplementary material
Source: MDPI journal article supplement (https://www.mdpi.com/2077-1312/10/10/1522)
Supplement: s1 [file s1]

**Table S1.** Coral attributes with their *Trapezia cymodoce* population of 21 sampled *Stylophora pistillata*. Strahler – coral Strahler number; A – colony diameter 1; B – colony diameter 2; H – colony height; Vol – coral volume (cm<sup>3</sup>); L – *T. cymodoce* large size; M – *T. cymodoce* medium size; S – *T. cymodoce* small size. .

| Coral | Strahler | A   | B   | H   | Vol (CM <sup>3</sup> ) | L | M | S |
|-------|----------|-----|-----|-----|------------------------|---|---|---|
| 1     | 4        | 101 | 82  | 64  | 277.5325               | 2 | 2 | 0 |
| 2     | 4        | 123 | 76  | 63  | 308.3599               | 2 | 1 | 0 |
| 3     | 4        | 81  | 73  | 43  | 133.1297               | 2 | 2 | 0 |
| 4     | 4        | 154 | 132 | 111 | 1181.452               | 2 | 0 | 1 |
| 5     | 4        | 94  | 71  | 72  | 251.6039               | 2 | 0 | 2 |
| 6     | 5        | 72  | 49  | 64  | 118.2244               | 2 | 1 | 0 |
| 7     | 4        | 83  | 85  | 59  | 217.9454               | 2 | 2 | 0 |
| 8     | 5        | 102 | 75  | 65  | 260.3595               | 2 | 0 | 1 |
| 9     | 4        | 82  | 69  | 58  | 171.8263               | 0 | 2 | 0 |
| 10    | 4        | 98  | 82  | 73  | 307.1577               | 1 | 2 | 1 |
| 11    | 4        | 102 | 87  | 72  | 334.5419               | 1 | 1 | 0 |
| 12    | 5        | 135 | 112 | 90  | 712.5132               | 2 | 2 | 2 |
| 13    | 4        | 137 | 100 | 84  | 602.5575               | 2 | 0 | 1 |
| 14    | 4        | 129 | 96  | 63  | 408.5076               | 2 | 0 | 1 |
| 15    | 6        | 130 | 155 | 105 | 1107.804               | 3 | 2 | 1 |
| 16    | 4        | 146 | 143 | 93  | 1016.648               | 2 | 3 | 0 |
| 17    | 5        | 128 | 142 | 83  | 789.9053               | 2 | 0 | 1 |
| 18    | 4        | 145 | 112 | 95  | 807.8082               | 2 | 2 | 0 |
| 19    | 5        | 187 | 156 | 115 | 1756.559               | 2 | 1 | 1 |
| 20    | 6        | 238 | 167 | 101 | 2101.907               | 2 | 2 | 1 |
| 21    | 4        | 109 | 67  | 75  | 286.7881               | 2 | 0 | 2 |

**Table S2.** Day and night survey results of *Trapezia cymodoce* and *Trapezia digitalis* crabs found on 193 *Stylophora pistillata* canopies at the Japanese Gardens, Gulf of Eilat, Red Sea during 2020–2021 (1–7m depth). Site-coral canopy number; D/N-day/night; Size - *Trapezia* carapace width (*T. cymodoce* >2 cm= large, 1–2 cm= medium, <1 cm= small; *T. digitalis* large >1.5 cm= large, 1–1.5 cm=medium, and <1 cm= small); Comp – Canopy compartment (Un) understory; (B) base; (M) middle; (B-M) base, and middle; (B-Up) base, middle, and up; (M-Up) middle and up compartments; Strahler - canopy Strahler number; Coral Vol – coral volume in cm<sup>3</sup>.

| Site | D/N | Species                  | Size | Quantity | Comp    | Strahler | Coral Vol (cm <sup>3</sup> ) | Year |
|------|-----|--------------------------|------|----------|---------|----------|------------------------------|------|
| 1D   | D   | <i>Trapezia cymodoce</i> | L    | 1        | B       | 5        | 788.02                       | 2020 |
| 1N   | N   | <i>Trapezia cymodoce</i> | L    | 2        | M TO UP | 5        | 788.02                       | 2020 |
| 2D   | D   | <i>Trapezia cymodoce</i> | L    | 2        | B       | 5        | 376.99                       | 2020 |
| 2N   | N   | <i>Trapezia cymodoce</i> | L    | 2        | M TO UP | 5        | 376.99                       | 2020 |
| 3N   | N   | <i>Trapezia cymodoce</i> | L    | 2        | M TO UP | 5        | 816.81                       | 2020 |
| 4D   | D   | <i>Trapezia cymodoce</i> | L    | 2        | B       | 4        | 264.37                       | 2020 |
| 4N   | N   | <i>Trapezia cymodoce</i> | L    | 2        | M TO UP | 4        | 264.37                       | 2020 |
| 4N   | N   | <i>Trapezia cymodoce</i> | M    | 1        | M TO UP | 4        | 264.37                       | 2020 |
| 5D   | D   | <i>Trapezia cymodoce</i> | L    | 2        | B       | 4        | 952.95                       | 2020 |
| 5N   | N   | <i>Trapezia cymodoce</i> | L    | 2        | B TO M  | 4        | 952.95                       | 2020 |
| 6D   | D   | <i>Trapezia cymodoce</i> | M    | 2        | B       | 4        | 1319.47                      | 2020 |
| 6N   | N   | <i>Trapezia cymodoce</i> | S    | 1        | M TO UP | 4        | 1319.47                      | 2020 |
| 7D   | D   | <i>Trapezia cymodoce</i> | L    | 2        | B       | 3        | 117.29                       | 2020 |
| 7N   | N   | <i>Trapezia cymodoce</i> | M    | 2        | M TO UP | 3        | 117.29                       | 2020 |
| 8D   | D   | <i>Trapezia cymodoce</i> | M    | 2        | B       | 5        | 4247.43                      | 2020 |
| 8N   | N   | <i>Trapezia cymodoce</i> | L    | 3        | B TO M  | 5        | 4247.43                      | 2020 |
| 8N   | N   | <i>Trapezia cymodoce</i> | L    | 2        | M       | 5        | 4247.43                      | 2020 |
| 9N   | N   | <i>Trapezia cymodoce</i> | M    | 2        | M       | 4        | 1880.24                      | 2020 |
| 9N   | N   | <i>Trapezia cymodoce</i> | L    | 2        | B TO M  | 4        | 1880.24                      | 2020 |
| 10D  | D   | <i>Trapezia cymodoce</i> | L    | 4        | B       | 4        | 339.29                       | 2020 |
| 10N  | N   | <i>Trapezia cymodoce</i> | L    | 4        | M TO UP | 4        | 339.29                       | 2020 |
| 10N  | N   | <i>Trapezia cymodoce</i> | M    | 2        | M TO UP | 4        | 339.29                       | 2020 |
| 11D  | D   | <i>Trapezia cymodoce</i> | L    | 2        | B       | 5        | 1671.28                      | 2020 |
| 11N  | N   | <i>Trapezia cymodoce</i> | L    | 2        | B TO M  | 5        | 1671.28                      | 2020 |
| 11N  | N   | <i>Trapezia cymodoce</i> | M    | 2        | M TO UP | 5        | 1671.28                      | 2020 |
| 12D  | D   | <i>Trapezia cymodoce</i> | L    | 1        | B       | 4        | 414.69                       | 2020 |
| 12N  | N   | <i>Trapezia cymodoce</i> | M    | 1        | M TO UP | 4        | 414.69                       | 2020 |
| 13D  | D   | <i>Trapezia cymodoce</i> | L    | 1        | B       | 6        | 8516.65                      | 2020 |
| 13N  | N   | <i>Trapezia cymodoce</i> | L    | 3        | B TO UP | 6        | 8516.65                      | 2020 |
| 14D  | D   | <i>Trapezia cymodoce</i> | M    | 1        | B       | 4        | 1744.63                      | 2020 |
| 14N  | N   | <i>Trapezia cymodoce</i> | M    | 1        | UP      | 4        | 1744.63                      | 2020 |
| 16D  | D   | <i>Trapezia cymodoce</i> | L    | 2        | B       | 6        | 12007.17                     | 2020 |
| 16N  | N   | <i>Trapezia cymodoce</i> | M    | 2        | UP      | 6        | 12007.17                     | 2020 |
| 16N  | N   | <i>Trapezia cymodoce</i> | L    | 2        | B TO M  | 6        | 12007.17                     | 2020 |
| 17D  | D   | <i>Trapezia cymodoce</i> | S    | 3        | B       | 4        | 3418.05                      | 2020 |
| 17N  | N   | <i>Trapezia cymodoce</i> | L    | 2        | B       | 4        | 3418.05                      | 2020 |
| 17N  | N   | <i>Trapezia cymodoce</i> | M    | 3        | M TO UP | 4        | 3418.05                      | 2020 |
| 18D  | D   | <i>Trapezia cymodoce</i> | L    | 2        | M       | 4        | 737.23                       | 2020 |
| 18N  | N   | <i>Trapezia cymodoce</i> | L    | 2        | B TO UP | 4        | 737.23                       | 2020 |
| 19N  | N   | <i>Trapezia cymodoce</i> | L    | 2        | M       | 3        | 358.14                       | 2020 |
| 19N  | N   | <i>Trapezia cymodoce</i> | M    | 1        | M       | 3        | 358.14                       | 2020 |
| 20D  | D   | <i>Trapezia cymodoce</i> | L    | 2        | B       | 4        | 5013.98                      | 2020 |
| 20N  | N   | <i>Trapezia cymodoce</i> | L    | 2        | M       | 4        | 5013.98                      | 2020 |

|     |   |                          |   |   |         |   |         |      |
|-----|---|--------------------------|---|---|---------|---|---------|------|
| 21D | D | <i>Trapezia cymodoce</i> | M | 1 | UN      | 3 | 347.30  | 2020 |
| 21N | N | <i>Trapezia cymodoce</i> | M | 2 | UP      | 3 | 347.30  | 2020 |
| 22D | D | <i>Trapezia cymodoce</i> | L | 1 | B       | 5 | 6614.10 | 2020 |
| 22N | N | <i>Trapezia cymodoce</i> | M | 2 | M       | 5 | 6614.10 | 2020 |
| 22N | N | <i>Trapezia cymodoce</i> | L | 2 | B TO M  | 5 | 6614.10 | 2020 |
| 23D | D | <i>Trapezia cymodoce</i> | M | 3 | B       | 4 | 2450.44 | 2020 |
| 23N | N | <i>Trapezia cymodoce</i> | L | 2 | B TO M  | 4 | 2450.44 | 2020 |
| 23N | N | <i>Trapezia cymodoce</i> | M | 1 | M       | 4 | 2450.44 | 2020 |
| 24D | D | <i>Trapezia cymodoce</i> | L | 1 | B       | 4 | 764.84  | 2020 |
| 24N | N | <i>Trapezia cymodoce</i> | L | 2 | B TO M  | 4 | 764.84  | 2020 |
| 25D | D | <i>Trapezia cymodoce</i> | L | 1 | B       | 5 | 3084.81 | 2020 |
| 25N | N | <i>Trapezia cymodoce</i> | L | 2 | B TO M  | 5 | 3084.81 | 2020 |
| 25N | N | <i>Trapezia cymodoce</i> | M | 1 | UP      | 5 | 3084.81 | 2020 |
| 26N | N | <i>Trapezia cymodoce</i> | L | 3 | B TO M  | 3 | 144.42  | 2020 |
| 26N | N | <i>Trapezia cymodoce</i> | M | 1 | B TO M  | 3 | 144.42  | 2020 |
| 27D | D | <i>Trapezia cymodoce</i> | L | 2 | B       | 4 | 2448.18 | 2020 |
| 27N | N | <i>Trapezia cymodoce</i> | L | 2 | B TO M  | 4 | 2448.18 | 2020 |
| 27N | N | <i>Trapezia cymodoce</i> | M | 2 | UN      | 4 | 2448.18 | 2020 |
| 28D | D | <i>Trapezia cymodoce</i> | L | 1 | B       | 4 | 663.50  | 2020 |
| 28N | N | <i>Trapezia cymodoce</i> | L | 2 | B TO M  | 4 | 663.50  | 2020 |
| 29D | D | <i>Trapezia cymodoce</i> | L | 2 | B       | 4 | 3626.22 | 2020 |
| 29D | D | <i>Trapezia cymodoce</i> | M | 1 | B TO M  | 4 | 3626.22 | 2020 |
| 29N | N | <i>Trapezia cymodoce</i> | L | 2 | B TO M  | 4 | 3626.22 | 2020 |
| 29N | N | <i>Trapezia cymodoce</i> | M | 1 | UP      | 4 | 3626.22 | 2020 |
| 30N | N | <i>Trapezia cymodoce</i> | L | 1 | M       | 3 | 138.33  | 2020 |
| 30N | N | <i>Trapezia cymodoce</i> | S | 2 | M TO UP | 3 | 138.33  | 2020 |
| 31N | N | <i>Trapezia cymodoce</i> | M | 2 | B TO M  | 3 | 119.22  | 2020 |
| 32N | N | <i>Trapezia cymodoce</i> | M | 1 | UN      | 3 | 125.63  | 2020 |
| 32N | N | <i>Trapezia cymodoce</i> | M | 1 | M       | 3 | 125.63  | 2020 |
| 33D | D | <i>Trapezia cymodoce</i> | L | 2 | B       | 4 | 1188.27 | 2020 |
| 33N | N | <i>Trapezia cymodoce</i> | L | 2 | B TO M  | 4 | 1188.27 | 2020 |
| 34D | D | <i>Trapezia cymodoce</i> | L | 2 | B       | 5 | 887.15  | 2020 |
| 34N | N | <i>Trapezia cymodoce</i> | M | 1 | B TO M  | 5 | 887.15  | 2020 |
| 34N | N | <i>Trapezia cymodoce</i> | L | 1 | B TO M  | 5 | 887.15  | 2020 |
| 35D | D | <i>Trapezia cymodoce</i> | L | 2 | B       | 4 | 2423.61 | 2020 |
| 35N | N | <i>Trapezia cymodoce</i> | L | 2 | B TO M  | 4 | 2423.61 | 2020 |
| 35N | N | <i>Trapezia cymodoce</i> | M | 1 | M       | 4 | 2423.61 | 2020 |
| 36D | D | <i>Trapezia cymodoce</i> | L | 2 | B       | 4 | 1770.13 | 2020 |
| 36N | N | <i>Trapezia cymodoce</i> | L | 2 | B TO M  | 4 | 1770.13 | 2020 |
| 37D | D | <i>Trapezia cymodoce</i> | L | 2 | B       | 4 | 5170.93 | 2020 |
| 37N | N | <i>Trapezia cymodoce</i> | L | 2 | M       | 4 | 5170.93 | 2020 |
| 37N | N | <i>Trapezia cymodoce</i> | M | 2 | B TO M  | 4 | 5170.93 | 2020 |
| 38D | D | <i>Trapezia cymodoce</i> | M | 2 | B       | 3 | 563.53  | 2020 |
| 38N | N | <i>Trapezia cymodoce</i> | M | 2 | M       | 3 | 563.53  | 2020 |
| 39D | D | <i>Trapezia cymodoce</i> | L | 2 | B       | 3 | 834.66  | 2020 |
| 39N | N | <i>Trapezia cymodoce</i> | M | 2 | B TO M  | 3 | 834.66  | 2020 |
| 39N | N | <i>Trapezia cymodoce</i> | L | 2 | B TO M  | 3 | 834.66  | 2020 |
| 41D | D | <i>Trapezia cymodoce</i> | L | 2 | B       | 4 | 1380.79 | 2020 |
| 41N | N | <i>Trapezia cymodoce</i> | M | 2 | M       | 4 | 1380.79 | 2020 |
| 41N | N | <i>Trapezia cymodoce</i> | L | 2 | B TO M  | 4 | 1380.79 | 2020 |
| 42N | N | <i>Trapezia cymodoce</i> | M | 1 | M       | 3 | 386.45  | 2020 |

|     |   |                          |   |   |         |   |          |      |
|-----|---|--------------------------|---|---|---------|---|----------|------|
| 43N | N | <i>Trapezia cymodoce</i> | M | 1 | M       | 3 | 517.14   | 2020 |
| 44D | D | <i>Trapezia cymodoce</i> | L | 2 | B       | 4 | 2969.75  | 2020 |
| 44D | D | <i>Trapezia cymodoce</i> | M | 1 | B       | 4 | 2969.75  | 2020 |
| 44N | N | <i>Trapezia cymodoce</i> | L | 2 | B TO M  | 4 | 2969.75  | 2020 |
| 45D | D | <i>Trapezia cymodoce</i> | L | 2 | B       | 4 | 2431.12  | 2020 |
| 45N | N | <i>Trapezia cymodoce</i> | L | 2 | B TO M  | 4 | 2431.12  | 2020 |
| 46D | D | <i>Trapezia cymodoce</i> | L | 2 | B       | 4 | 4167.01  | 2020 |
| 46N | N | <i>Trapezia cymodoce</i> | L | 2 | B TO M  | 4 | 4167.01  | 2020 |
| 47D | D | <i>Trapezia cymodoce</i> | L | 2 | B       | 5 | 2556.15  | 2020 |
| 47D | D | <i>Trapezia cymodoce</i> | M | 1 | B TO M  | 5 | 2556.15  | 2020 |
| 47N | N | <i>Trapezia cymodoce</i> | L | 2 | B TO M  | 5 | 2556.15  | 2020 |
| 48D | D | <i>Trapezia cymodoce</i> | L | 2 | B       | 4 | 1143.79  | 2020 |
| 48N | N | <i>Trapezia cymodoce</i> | L | 2 | B TO M  | 4 | 1143.79  | 2020 |
| 49D | D | <i>Trapezia cymodoce</i> | M | 3 | M       | 4 | 11315.34 | 2020 |
| 49D | D | <i>Trapezia cymodoce</i> | L | 2 | B       | 4 | 11315.34 | 2020 |
| 49N | N | <i>Trapezia cymodoce</i> | M | 3 | M TO UP | 4 | 11315.34 | 2020 |
| 49N | N | <i>Trapezia cymodoce</i> | L | 2 | B TO M  | 4 | 11315.34 | 2020 |
| 50N | N | <i>Trapezia cymodoce</i> | L | 2 | B TO M  | 4 | 916.84   | 2020 |
| 51N | N | <i>Trapezia cymodoce</i> | L | 2 | B TO M  | 5 | 1802.35  | 2020 |
| 52N | N | <i>Trapezia cymodoce</i> | L | 2 | B TO M  | 5 | 1130.91  | 2020 |
| 52N | N | <i>Trapezia cymodoce</i> | M | 3 | M       | 5 | 1130.91  | 2020 |
| 53N | N | <i>Trapezia cymodoce</i> | M | 1 | M       | 4 | 371.90   | 2020 |
| 54N | N | <i>Trapezia cymodoce</i> | M | 1 | M       | 4 | 533.22   | 2020 |
| 55D | D | <i>Trapezia cymodoce</i> | L | 4 | B TO M  | 5 | 3074.32  | 2020 |
| 55N | N | <i>Trapezia cymodoce</i> | L | 2 | B       | 5 | 3074.32  | 2020 |
| 56D | D | <i>Trapezia cymodoce</i> | L | 2 | B TO M  | 4 | 1088.14  | 2020 |
| 56N | N | <i>Trapezia cymodoce</i> | M | 2 | B TO UP | 4 | 1088.14  | 2020 |
| 57D | D | <i>Trapezia cymodoce</i> | L | 2 | B       | 4 | 1325.36  | 2020 |
| 57N | N | <i>Trapezia cymodoce</i> | L | 2 | B       | 4 | 1325.36  | 2020 |
| 58N | N | <i>Trapezia cymodoce</i> | M | 2 | B       | 3 | 77.52    | 2020 |
| 59D | D | <i>Trapezia cymodoce</i> | L | 2 | B       | 4 | 501.29   | 2020 |
| 59N | N | <i>Trapezia cymodoce</i> | M | 2 | B       | 4 | 501.29   | 2020 |
| 60D | D | <i>Trapezia cymodoce</i> | L | 2 | B TO M  | 6 | 4777.23  | 2020 |
| 60N | N | <i>Trapezia cymodoce</i> | L | 2 | B       | 6 | 4777.23  | 2020 |
| 60N | N | <i>Trapezia cymodoce</i> | M | 2 | M       | 6 | 4777.23  | 2020 |
| 61D | D | <i>Trapezia cymodoce</i> | L | 2 | B       | 6 | 18496.84 | 2020 |
| 61N | N | <i>Trapezia cymodoce</i> | M | 2 | M       | 6 | 18496.84 | 2020 |
| 61N | N | <i>Trapezia cymodoce</i> | L | 2 | B       | 6 | 18496.84 | 2020 |
| 62D | D | <i>Trapezia cymodoce</i> | L | 2 | B       | 6 | 3731.82  | 2020 |
| 62N | N | <i>Trapezia cymodoce</i> | L | 2 | B TO M  | 6 | 3731.82  | 2020 |
| 62N | N | <i>Trapezia cymodoce</i> | M | 1 | M       | 6 | 3731.82  | 2020 |
| 62N | N | <i>Trapezia cymodoce</i> | S | 1 | UP      | 6 | 3731.82  | 2020 |
| 63N | N | <i>Trapezia cymodoce</i> | M | 2 | B TO M  | 4 | 199.96   | 2020 |
| 64D | D | <i>Trapezia cymodoce</i> | L | 2 | B TO M  | 5 | 8970.25  | 2020 |
| 64N | N | <i>Trapezia cymodoce</i> | M | 1 | M       | 5 | 8970.25  | 2020 |
| 64N | N | <i>Trapezia cymodoce</i> | L | 2 | B       | 5 | 8970.25  | 2020 |
| 65D | D | <i>Trapezia cymodoce</i> | L | 2 | B       | 3 | 4068.29  | 2020 |
| 65N | N | <i>Trapezia cymodoce</i> | L | 2 | B       | 3 | 4068.29  | 2020 |
| 65N | N | <i>Trapezia cymodoce</i> | M | 1 | UP      | 3 | 4068.29  | 2020 |
| 66D | D | <i>Trapezia cymodoce</i> | L | 2 | B       | 4 | 2721.17  | 2020 |
| 66N | N | <i>Trapezia cymodoce</i> | L | 2 | B       | 4 | 2721.17  | 2020 |

|     |   |                          |   |   |         |   |         |      |
|-----|---|--------------------------|---|---|---------|---|---------|------|
| 67D | D | <i>Trapezia cymodoce</i> | M | 1 | UN      | 4 | 14.86   | 2020 |
| 67N | N | <i>Trapezia cymodoce</i> | M | 1 | B       | 4 | 14.86   | 2020 |
| 68D | D | <i>Trapezia cymodoce</i> | L | 2 | B       | 5 | 8181.86 | 2020 |
| 68N | N | <i>Trapezia cymodoce</i> | L | 2 | B TO M  | 5 | 8181.86 | 2020 |
| 68N | N | <i>Trapezia cymodoce</i> | S | 1 | UP      | 5 | 8181.86 | 2020 |
| 68N | N | <i>Trapezia cymodoce</i> | L | 2 | B TO M  | 5 | 8181.86 | 2020 |
| 68N | N | <i>Trapezia cymodoce</i> | M | 1 | M TO UP | 5 | 8181.86 | 2020 |
| 69D | D | <i>Trapezia cymodoce</i> | L | 2 | B       | 4 | 743.88  | 2020 |
| 69N | N | <i>Trapezia cymodoce</i> | L | 2 | M       | 4 | 743.88  | 2020 |
| 69N | N | <i>Trapezia cymodoce</i> | S | 1 | M       | 4 | 743.88  | 2020 |
| 70D | D | <i>Trapezia cymodoce</i> | L | 2 | B       | 4 | 844.44  | 2020 |
| 70N | N | <i>Trapezia cymodoce</i> | L | 2 | B       | 4 | 844.44  | 2020 |
| 70N | N | <i>Trapezia cymodoce</i> | M | 2 | M       | 4 | 844.44  | 2020 |
| 70N | N | <i>Trapezia cymodoce</i> | S | 1 | UP      | 4 | 844.44  | 2020 |
| 71D | D | <i>Trapezia cymodoce</i> | L | 2 | B       | 4 | 1119.24 | 2020 |
| 71N | N | <i>Trapezia cymodoce</i> | L | 2 | B       | 4 | 1119.24 | 2020 |
| 72D | D | <i>Trapezia cymodoce</i> | L | 2 | B       | 5 | 4784.92 | 2020 |
| 72N | N | <i>Trapezia cymodoce</i> | L | 2 | B TO M  | 5 | 4784.92 | 2020 |
| 72N | N | <i>Trapezia cymodoce</i> | M | 1 | M       | 5 | 4784.92 | 2020 |
| 72N | N | <i>Trapezia cymodoce</i> | S | 2 | UP      | 5 | 4784.92 | 2020 |
| 73D | D | <i>Trapezia cymodoce</i> | L | 2 | B       | 5 | 3371.83 | 2020 |
| 73N | N | <i>Trapezia cymodoce</i> | L | 2 | B TO M  | 5 | 3371.83 | 2020 |
| 73N | N | <i>Trapezia cymodoce</i> | M | 1 | M       | 5 | 3371.83 | 2020 |
| 74D | D | <i>Trapezia cymodoce</i> | L | 2 | B       | 5 | 995.26  | 2020 |
| 74N | N | <i>Trapezia cymodoce</i> | L | 2 | B TO M  | 5 | 995.26  | 2020 |
| 74N | N | <i>Trapezia cymodoce</i> | M | 2 | M       | 5 | 995.26  | 2020 |
| 75D | D | <i>Trapezia cymodoce</i> | L | 2 | B       | 4 | 487.87  | 2020 |
| 75N | N | <i>Trapezia cymodoce</i> | L | 2 | B TO M  | 4 | 487.87  | 2020 |
| 75N | N | <i>Trapezia cymodoce</i> | M | 2 | M       | 4 | 487.87  | 2020 |
| 76D | D | <i>Trapezia cymodoce</i> | L | 2 | B       | 3 | 321.43  | 2020 |
| 76N | N | <i>Trapezia cymodoce</i> | M | 2 | M       | 3 | 321.43  | 2020 |
| 78D | D | <i>Trapezia cymodoce</i> | L | 2 | B       | 4 | 525.66  | 2020 |
| 78N | N | <i>Trapezia cymodoce</i> | L | 2 | B TO M  | 4 | 525.66  | 2020 |
| 79D | D | <i>Trapezia cymodoce</i> | L | 2 | M       | 6 | 1640.91 | 2020 |
| 79N | N | <i>Trapezia cymodoce</i> | L | 2 | B TO M  | 6 | 1640.91 | 2020 |
| 79N | N | <i>Trapezia cymodoce</i> | M | 1 | M       | 6 | 1640.91 | 2020 |
| 80D | D | <i>Trapezia cymodoce</i> | L | 2 | B       | 5 | 983.27  | 2020 |
| 80N | N | <i>Trapezia cymodoce</i> | L | 2 | B TO M  | 5 | 983.27  | 2020 |
| 81D | D | <i>Trapezia cymodoce</i> | L | 2 | B       | 4 | 1231.98 | 2020 |
| 81N | N | <i>Trapezia cymodoce</i> | L | 2 | B TO M  | 4 | 1231.98 | 2020 |
| 82D | D | <i>Trapezia cymodoce</i> | M | 2 | B       | 3 | 74.92   | 2020 |
| 82N | N | <i>Trapezia cymodoce</i> | M | 2 | M       | 3 | 74.92   | 2020 |
| 83D | D | <i>Trapezia cymodoce</i> | L | 2 | B       | 6 | 1011.77 | 2020 |
| 83N | N | <i>Trapezia cymodoce</i> | L | 2 | M       | 6 | 1011.77 | 2020 |
| 83N | N | <i>Trapezia cymodoce</i> | M | 1 | M       | 6 | 1011.77 | 2020 |
| 84D | D | <i>Trapezia cymodoce</i> | M | 3 | M       | 3 | 60.15   | 2020 |
| 84N | N | <i>Trapezia cymodoce</i> | M | 3 | M       | 3 | 60.15   | 2020 |
| 85N | N | <i>Trapezia cymodoce</i> | M | 1 | M       | 2 | 23.09   | 2020 |
| 86D | D | <i>Trapezia cymodoce</i> | M | 3 | B       | 5 | 4033.45 | 2020 |
| 86D | D | <i>Trapezia cymodoce</i> | L | 2 | B       | 5 | 4033.45 | 2020 |
| 86N | N | <i>Trapezia cymodoce</i> | L | 2 | B       | 5 | 4033.45 | 2020 |

|      |   |                           |   |   |         |   |         |      |
|------|---|---------------------------|---|---|---------|---|---------|------|
| 86N  | N | <i>Trapezia cymodoce</i>  | M | 3 | M       | 5 | 4033.45 | 2020 |
| 86N  | N | <i>Trapezia cymodoce</i>  | S | 2 | M TO UP | 5 | 4033.45 | 2020 |
| 87D  | D | <i>Trapezia cymodoce</i>  | M | 2 | M       | 3 | 195.28  | 2020 |
| 87N  | N | <i>Trapezia cymodoce</i>  | M | 2 | M       | 3 | 195.28  | 2020 |
| 88D  | D | <i>Trapezia cymodoce</i>  | M | 2 | B       | 4 | 228.91  | 2020 |
| 88N  | N | <i>Trapezia cymodoce</i>  | M | 2 | M       | 4 | 228.91  | 2020 |
| 89D  | D | <i>Trapezia cymodoce</i>  | L | 2 | B       | 4 | 974.06  | 2020 |
| 89N  | N | <i>Trapezia cymodoce</i>  | L | 2 | B       | 4 | 974.06  | 2020 |
| 90N  | N | <i>Trapezia cymodoce</i>  | M | 2 | B TO M  | 5 | 2763.26 | 2020 |
| 91D  | D | <i>Trapezia cymodoce</i>  | L | 1 | B       | 4 | 474.77  | 2020 |
| 91N  | N | <i>Trapezia cymodoce</i>  | L | 1 | B       | 4 | 474.77  | 2020 |
| 91N  | N | <i>Trapezia cymodoce</i>  | L | 2 | B TO M  | 4 | 474.77  | 2020 |
| 92D  | D | <i>Trapezia cymodoce</i>  | M | 2 | B       | 4 | 286.07  | 2020 |
| 92N  | N | <i>Trapezia cymodoce</i>  | M | 2 | B TO M  | 4 | 286.07  | 2020 |
| 93D  | D | <i>Trapezia cymodoce</i>  | L | 2 | B       | 4 | 1623.51 | 2020 |
| 93N  | N | <i>Trapezia cymodoce</i>  | L | 2 | B TO M  | 4 | 1623.51 | 2020 |
| 93N  | N | <i>Trapezia cymodoce</i>  | M | 1 | B       | 4 | 1623.51 | 2020 |
| 94D  | D | <i>Trapezia cymodoce</i>  | L | 2 | B       | 5 | 2013.48 | 2020 |
| 94D  | D | <i>Trapezia cymodoce</i>  | L | 1 | M       | 5 | 2013.48 | 2020 |
| 94N  | N | <i>Trapezia cymodoce</i>  | L | 2 | B TO UP | 5 | 2013.48 | 2020 |
| 95D  | D | <i>Trapezia cymodoce</i>  | L | 2 | B       | 4 | 589.01  | 2020 |
| 95N  | N | <i>Trapezia cymodoce</i>  | L | 2 | B TO M  | 4 | 589.01  | 2020 |
| 96D  | D | <i>Trapezia cymodoce</i>  | L | 1 | M       | 4 | 906.10  | 2020 |
| 96N  | N | <i>Trapezia cymodoce</i>  | L | 1 | M       | 4 | 906.10  | 2020 |
| 96N  | N | <i>Trapezia cymodoce</i>  | L | 2 | B TO M  | 4 | 906.10  | 2020 |
| 97D  | D | <i>Trapezia cymodoce</i>  | L | 2 | B       | 4 | 522.25  | 2020 |
| 97N  | N | <i>Trapezia cymodoce</i>  | L | 2 | B TO M  | 4 | 522.25  | 2020 |
| 98D  | D | <i>Trapezia cymodoce</i>  | L | 1 | B       | 4 | 675.64  | 2020 |
| 98N  | N | <i>Trapezia cymodoce</i>  | L | 1 | B       | 4 | 675.64  | 2020 |
| 98N  | N | <i>Trapezia cymodoce</i>  | M | 1 | M       | 4 | 675.64  | 2020 |
| 99N  | N | <i>Trapezia cymodoce</i>  | M | 1 | M       | 4 | 125.31  | 2020 |
| 99N  | N | <i>Trapezia cymodoce</i>  | S | 1 | UP      | 4 | 125.31  | 2020 |
| 100D | D | <i>Trapezia cymodoce</i>  | L | 2 | B       | 4 | 462.42  | 2020 |
| 100N | N | <i>Trapezia cymodoce</i>  | L | 2 | B TO M  | 4 | 462.42  | 2020 |
| 101N | N | <i>Trapezia cymodoce</i>  | L | 2 | B       | 4 | 260.84  | 2020 |
| 102D | D | <i>Trapezia cymodoce</i>  | M | 2 | B       | 5 | 506.42  | 2020 |
| 102N | N | <i>Trapezia cymodoce</i>  | M | 2 | M       | 5 | 506.42  | 2020 |
| 102N | N | <i>Trapezia cymodoce</i>  | M | 2 | B       | 5 | 506.42  | 2020 |
| 105D | D | <i>Trapezia cymodoce</i>  | M | 1 | B       | 2 | 37.82   | 2020 |
| 105N | N | <i>Trapezia cymodoce</i>  | M | 1 | B       | 2 | 37.82   | 2020 |
| 107N | N | <i>Trapezia cymodoce</i>  | M | 1 | B       | 2 | 12.69   | 2020 |
| 110N | N | <i>Trapezia cymodoce</i>  | S | 1 | B       | 2 | 16.95   | 2020 |
| 112D | D | <i>Trapezia cymodoce</i>  | S | 1 | M       | 2 | 16.93   | 2020 |
| 112N | N | <i>Trapezia cymodoce</i>  | S | 1 | M       | 2 | 16.93   | 2020 |
| 113D | D | <i>Trapezia cymodoce</i>  | M | 1 | B       | 2 | 64.84   | 2020 |
| 113N | N | <i>Trapezia cymodoce</i>  | M | 1 | M       | 2 | 64.84   | 2020 |
| 114N | N | <i>Trapezia cymodoce</i>  | L | 1 | B       | 2 | 49.83   | 2020 |
| 1D   | D | <i>Trapezia digitalis</i> | L | 2 | B       | 5 | 788.02  | 2020 |
| 1N   | N | <i>Trapezia digitalis</i> | M | 3 | UP      | 5 | 788.02  | 2020 |
| 3N   | N | <i>Trapezia digitalis</i> | L | 1 | M TO UP | 5 | 816.81  | 2020 |
| 3N   | N | <i>Trapezia digitalis</i> | S | 1 | UP      | 5 | 816.81  | 2020 |

|     |   |                           |   |   |         |   |          |      |
|-----|---|---------------------------|---|---|---------|---|----------|------|
| 5N  | N | <i>Trapezia digitalis</i> | M | 1 | M TO UP | 4 | 952.95   | 2020 |
| 6N  | N | <i>Trapezia digitalis</i> | M | 3 | M TO UP | 4 | 1319.47  | 2020 |
| 7N  | N | <i>Trapezia digitalis</i> | S | 1 | M TO UP | 3 | 117.29   | 2020 |
| 8N  | N | <i>Trapezia digitalis</i> | M | 1 | B TO M  | 5 | 4247.43  | 2020 |
| 9D  | D | <i>Trapezia digitalis</i> | M | 2 | B       | 4 | 1880.24  | 2020 |
| 9D  | D | <i>Trapezia digitalis</i> | L | 2 | B       | 4 | 1880.24  | 2020 |
| 9N  | N | <i>Trapezia digitalis</i> | S | 2 | M TO UP | 4 | 1880.24  | 2020 |
| 9N  | N | <i>Trapezia digitalis</i> | M | 2 | M       | 4 | 1880.24  | 2020 |
| 10D | D | <i>Trapezia digitalis</i> | L | 1 | M       | 4 | 339.29   | 2020 |
| 10N | N | <i>Trapezia digitalis</i> | M | 2 | M TO UP | 4 | 339.29   | 2020 |
| 12D | D | <i>Trapezia digitalis</i> | M | 2 | B       | 4 | 414.69   | 2020 |
| 12N | N | <i>Trapezia digitalis</i> | M | 2 | M TO UP | 4 | 414.69   | 2020 |
| 13D | D | <i>Trapezia digitalis</i> | M | 1 | B       | 6 | 8516.65  | 2020 |
| 13N | N | <i>Trapezia digitalis</i> | M | 2 | UP      | 6 | 8516.65  | 2020 |
| 15D | D | <i>Trapezia digitalis</i> | M | 2 | B       | 4 | 345.58   | 2020 |
| 15N | N | <i>Trapezia digitalis</i> | M | 2 | M TO UP | 4 | 345.58   | 2020 |
| 16N | N | <i>Trapezia digitalis</i> | M | 2 | UP      | 6 | 12007.17 | 2020 |
| 16N | N | <i>Trapezia digitalis</i> | S | 1 | UP      | 6 | 12007.17 | 2020 |
| 17N | N | <i>Trapezia digitalis</i> | M | 3 | M TO UP | 4 | 3418.05  | 2020 |
| 20D | D | <i>Trapezia digitalis</i> | M | 1 | B       | 4 | 5013.98  | 2020 |
| 20N | N | <i>Trapezia digitalis</i> | M | 2 | M       | 4 | 5013.98  | 2020 |
| 20N | N | <i>Trapezia digitalis</i> | M | 1 | UP      | 4 | 5013.98  | 2020 |
| 22D | D | <i>Trapezia digitalis</i> | M | 2 | B       | 5 | 6614.10  | 2020 |
| 22N | N | <i>Trapezia digitalis</i> | S | 2 | UP      | 5 | 6614.10  | 2020 |
| 22N | N | <i>Trapezia digitalis</i> | M | 2 | M       | 5 | 6614.10  | 2020 |
| 24N | N | <i>Trapezia digitalis</i> | M | 1 | UP      | 4 | 764.84   | 2020 |
| 25D | D | <i>Trapezia digitalis</i> | M | 1 | B       | 5 | 3084.81  | 2020 |
| 25N | N | <i>Trapezia digitalis</i> | S | 4 | UP      | 5 | 3084.81  | 2020 |
| 25N | N | <i>Trapezia digitalis</i> | M | 1 | M       | 5 | 3084.81  | 2020 |
| 27N | N | <i>Trapezia digitalis</i> | M | 1 | UP      | 4 | 2448.18  | 2020 |
| 30N | N | <i>Trapezia digitalis</i> | S | 3 | UP      | 3 | 138.33   | 2020 |
| 30N | N | <i>Trapezia digitalis</i> | M | 1 | M       | 3 | 138.33   | 2020 |
| 31N | N | <i>Trapezia digitalis</i> | S | 1 | M       | 3 | 119.22   | 2020 |
| 32D | D | <i>Trapezia digitalis</i> | M | 1 | B       | 3 | 125.63   | 2020 |
| 32N | N | <i>Trapezia digitalis</i> | M | 1 | M       | 3 | 125.63   | 2020 |
| 33N | N | <i>Trapezia digitalis</i> | S | 1 | UP      | 4 | 1188.27  | 2020 |
| 34N | N | <i>Trapezia digitalis</i> | S | 1 | UP      | 5 | 887.15   | 2020 |
| 39N | N | <i>Trapezia digitalis</i> | S | 3 | UP      | 3 | 834.66   | 2020 |
| 39N | N | <i>Trapezia digitalis</i> | M | 2 | M TO UP | 3 | 834.66   | 2020 |
| 40D | D | <i>Trapezia digitalis</i> | M | 2 | B       | 4 | 648.59   | 2020 |
| 40N | N | <i>Trapezia digitalis</i> | M | 2 | M       | 4 | 648.59   | 2020 |
| 40N | N | <i>Trapezia digitalis</i> | S | 4 | UP      | 4 | 648.59   | 2020 |
| 41D | D | <i>Trapezia digitalis</i> | M | 1 | B       | 4 | 1380.79  | 2020 |
| 41N | N | <i>Trapezia digitalis</i> | M | 2 | M       | 4 | 1380.79  | 2020 |
| 42N | N | <i>Trapezia digitalis</i> | S | 3 | UP      | 3 | 386.45   | 2020 |
| 43D | D | <i>Trapezia digitalis</i> | M | 1 | B       | 3 | 517.14   | 2020 |
| 43N | N | <i>Trapezia digitalis</i> | M | 1 | B TO M  | 3 | 517.14   | 2020 |
| 49D | D | <i>Trapezia digitalis</i> | L | 1 | M       | 4 | 11315.34 | 2020 |
| 49N | N | <i>Trapezia digitalis</i> | M | 2 | M       | 4 | 11315.34 | 2020 |
| 53N | N | <i>Trapezia digitalis</i> | M | 2 | M       | 4 | 371.90   | 2020 |
| 55N | N | <i>Trapezia digitalis</i> | M | 1 | M       | 5 | 3074.32  | 2020 |

|      |   |                           |   |   |         |   |          |      |
|------|---|---------------------------|---|---|---------|---|----------|------|
| 55N  | N | <i>Trapezia digitalis</i> | S | 1 | UP      | 5 | 3074.32  | 2020 |
| 56D  | D | <i>Trapezia digitalis</i> | S | 1 | UN      | 4 | 1088.14  | 2020 |
| 56N  | N | <i>Trapezia digitalis</i> | S | 1 | UP      | 4 | 1088.14  | 2020 |
| 60N  | N | <i>Trapezia digitalis</i> | M | 3 | M       | 6 | 4777.23  | 2020 |
| 60N  | N | <i>Trapezia digitalis</i> | S | 2 | UP      | 6 | 4777.23  | 2020 |
| 61N  | N | <i>Trapezia digitalis</i> | M | 3 | M       | 6 | 18496.84 | 2020 |
| 61N  | N | <i>Trapezia digitalis</i> | S | 2 | UP      | 6 | 18496.84 | 2020 |
| 62N  | N | <i>Trapezia digitalis</i> | M | 2 | M       | 6 | 3731.82  | 2020 |
| 63D  | D | <i>Trapezia digitalis</i> | M | 1 | B       | 4 | 199.96   | 2020 |
| 63N  | N | <i>Trapezia digitalis</i> | M | 2 | M       | 4 | 199.96   | 2020 |
| 64N  | N | <i>Trapezia digitalis</i> | M | 2 | M       | 5 | 8970.25  | 2020 |
| 65N  | N | <i>Trapezia digitalis</i> | M | 1 | M       | 3 | 4068.29  | 2020 |
| 66N  | N | <i>Trapezia digitalis</i> | M | 2 | M       | 4 | 2721.17  | 2020 |
| 68N  | N | <i>Trapezia digitalis</i> | S | 1 | UP      | 5 | 8181.86  | 2020 |
| 68N  | N | <i>Trapezia digitalis</i> | M | 2 | M       | 5 | 8181.86  | 2020 |
| 70D  | D | <i>Trapezia digitalis</i> | M | 1 | B       | 4 | 844.44   | 2020 |
| 70N  | N | <i>Trapezia digitalis</i> | S | 2 | UP      | 4 | 844.44   | 2020 |
| 72N  | N | <i>Trapezia digitalis</i> | L | 2 | M       | 5 | 4784.92  | 2020 |
| 72N  | N | <i>Trapezia digitalis</i> | S | 2 | UP      | 5 | 4784.92  | 2020 |
| 73D  | D | <i>Trapezia digitalis</i> | M | 1 | B       | 5 | 3371.83  | 2020 |
| 73N  | N | <i>Trapezia digitalis</i> | M | 1 | M TO UP | 5 | 3371.83  | 2020 |
| 74N  | N | <i>Trapezia digitalis</i> | M | 1 | M       | 5 | 995.26   | 2020 |
| 75D  | D | <i>Trapezia digitalis</i> | M | 1 | B       | 4 | 487.87   | 2020 |
| 75D  | D | <i>Trapezia digitalis</i> | M | 1 | M       | 4 | 487.87   | 2020 |
| 75N  | N | <i>Trapezia digitalis</i> | M | 2 | M       | 4 | 487.87   | 2020 |
| 80N  | N | <i>Trapezia digitalis</i> | M | 1 | M       | 5 | 983.27   | 2020 |
| 81D  | D | <i>Trapezia digitalis</i> | M | 1 | M       | 4 | 1231.98  | 2020 |
| 81N  | N | <i>Trapezia digitalis</i> | M | 2 | M       | 4 | 1231.98  | 2020 |
| 86N  | N | <i>Trapezia digitalis</i> | M | 2 | M       | 5 | 4033.45  | 2020 |
| 88N  | N | <i>Trapezia digitalis</i> | M | 1 | UN      | 4 | 228.91   | 2020 |
| 91N  | N | <i>Trapezia digitalis</i> | S | 2 | UP      | 4 | 474.77   | 2020 |
| 92N  | N | <i>Trapezia digitalis</i> | S | 2 | UP      | 4 | 286.07   | 2020 |
| 95N  | N | <i>Trapezia digitalis</i> | S | 2 | UP      | 4 | 589.01   | 2020 |
| 95N  | N | <i>Trapezia digitalis</i> | M | 1 | M       | 4 | 589.01   | 2020 |
| 96N  | N | <i>Trapezia digitalis</i> | M | 1 | M       | 4 | 906.10   | 2020 |
| 97D  | D | <i>Trapezia digitalis</i> | M | 1 | M       | 4 | 522.25   | 2020 |
| 97N  | N | <i>Trapezia digitalis</i> | M | 1 | M       | 4 | 522.25   | 2020 |
| 97N  | N | <i>Trapezia digitalis</i> | M | 2 | B       | 4 | 522.25   | 2020 |
| 101N | N | <i>Trapezia digitalis</i> | M | 1 | M       | 4 | 260.84   | 2020 |
| 101N | N | <i>Trapezia digitalis</i> | S | 1 | UP      | 4 | 260.84   | 2020 |
| 200D | D | <i>Trapezia cymodoce</i>  | L | 2 | B       | 4 | 600.56   | 2021 |
| 200N | N | <i>Trapezia cymodoce</i>  | L | 2 | B TO M  | 4 | 600.56   | 2021 |
| 200N | N | <i>Trapezia cymodoce</i>  | M | 2 | M       | 4 | 600.56   | 2021 |
| 200N | N | <i>Trapezia digitalis</i> | M | 2 | M       | 4 | 600.56   | 2021 |
| 201D | D | <i>Trapezia cymodoce</i>  | M | 2 | B       | 3 | 191.59   | 2021 |
| 201N | N | <i>Trapezia cymodoce</i>  | M | 4 | M       | 3 | 191.59   | 2021 |
| 202D | D | <i>Trapezia cymodoce</i>  | L | 2 | B       | 3 | 238.10   | 2021 |
| 202N | N | <i>Trapezia cymodoce</i>  | L | 2 | B       | 3 | 238.10   | 2021 |
| 202N | N | <i>Trapezia digitalis</i> | S | 1 | UP      | 3 | 238.10   | 2021 |
| 203D | D | <i>Trapezia cymodoce</i>  | L | 2 | B       | 6 | 5722.73  | 2021 |
| 203D | D | <i>Trapezia cymodoce</i>  | M | 4 | M       | 6 | 5722.73  | 2021 |



|      |   |                           |   |   |         |   |         |      |
|------|---|---------------------------|---|---|---------|---|---------|------|
| 203D | D | <i>Trapezia digitalis</i> | M | 3 | M       | 6 | 5722.73 | 2021 |
| 203N | N | <i>Trapezia cymodoce</i>  | L | 2 | B       | 6 | 5722.73 | 2021 |
| 203N | N | <i>Trapezia cymodoce</i>  | L | 2 | M       | 6 | 5722.73 | 2021 |
| 203N | N | <i>Trapezia digitalis</i> | S | 2 | M TO UP | 6 | 5722.73 | 2021 |
| 203N | N | <i>Trapezia digitalis</i> | M | 1 | M       | 6 | 5722.73 | 2021 |
| 204D | D | <i>Trapezia cymodoce</i>  | S | 1 | B       | 4 | 7.74    | 2021 |
| 204N | N | <i>Trapezia cymodoce</i>  | S | 4 | M       | 4 | 7.74    | 2021 |
| 205D | D | <i>Trapezia cymodoce</i>  | S | 1 | UN      | 3 | 28.59   | 2021 |
| 205N | N | <i>Trapezia cymodoce</i>  | S | 1 | M       | 3 | 28.59   | 2021 |
| 206D | D | <i>Trapezia cymodoce</i>  | M | 1 | B       | 3 | 353.95  | 2021 |
| 206N | N | <i>Trapezia cymodoce</i>  | M | 1 | B       | 3 | 353.95  | 2021 |
| 206N | N | <i>Trapezia digitalis</i> | M | 2 | M       | 3 | 353.95  | 2021 |
| 207D | D | <i>Trapezia cymodoce</i>  | L | 2 | B       | 3 | 200.39  | 2021 |
| 207N | N | <i>Trapezia cymodoce</i>  | L | 2 | B       | 3 | 200.39  | 2021 |
| 207N | N | <i>Trapezia digitalis</i> | M | 1 | M       | 3 | 200.39  | 2021 |
| 207N | N | <i>Trapezia cymodoce</i>  | S | 1 | UP      | 3 | 200.39  | 2021 |
| 208D | D | <i>Trapezia cymodoce</i>  | L | 2 | B       | 3 | 355.18  | 2021 |
| 208N | N | <i>Trapezia cymodoce</i>  | L | 2 | B       | 3 | 355.18  | 2021 |
| 208N | N | <i>Trapezia cymodoce</i>  | S | 2 | UP      | 3 | 355.18  | 2021 |
| 208N | N | <i>Trapezia digitalis</i> | M | 1 | M       | 3 | 355.18  | 2021 |
| 208N | N | <i>Trapezia cymodoce</i>  | S | 2 | M TO UP | 3 | 355.18  | 2021 |
| 209D | D | <i>Trapezia cymodoce</i>  | L | 2 | B       | 3 | 385.05  | 2021 |
| 209N | N | <i>Trapezia digitalis</i> | M | 3 | M TO UP | 3 | 385.05  | 2021 |
| 209N | N | <i>Trapezia cymodoce</i>  | L | 2 | B TO M  | 3 | 385.05  | 2021 |
| 209N | N | <i>Trapezia cymodoce</i>  | M | 1 | M       | 3 | 385.05  | 2021 |
| 210D | D | <i>Trapezia cymodoce</i>  | L | 1 | B       | 3 | 245.11  | 2021 |
| 210N | N | <i>Trapezia cymodoce</i>  | M | 1 | B       | 3 | 245.11  | 2021 |
| 210N | N | <i>Trapezia cymodoce</i>  | M | 2 | M       | 3 | 245.11  | 2021 |
| 210N | N | <i>Trapezia digitalis</i> | S | 2 | UP      | 3 | 245.11  | 2021 |
| 210N | N | <i>Trapezia cymodoce</i>  | S | 1 | UP      | 3 | 245.11  | 2021 |
| 211D | D | <i>Trapezia cymodoce</i>  | L | 2 | B       | 4 | 540.32  | 2021 |
| 211N | N | <i>Trapezia cymodoce</i>  | L | 2 | B       | 4 | 540.32  | 2021 |
| 211N | N | <i>Trapezia cymodoce</i>  | M | 1 | M       | 4 | 540.32  | 2021 |
| 211N | N | <i>Trapezia digitalis</i> | S | 2 | UP      | 4 | 540.32  | 2021 |
| 211N | N | <i>Trapezia digitalis</i> | M | 3 | M       | 4 | 540.32  | 2021 |
| 212D | D | <i>Trapezia cymodoce</i>  | M | 1 | B       | 2 | 4.74    | 2021 |
| 212N | N | <i>Trapezia cymodoce</i>  | M | 1 | M       | 2 | 4.74    | 2021 |
| 213D | D | <i>Trapezia cymodoce</i>  | L | 2 | B TO M  | 4 | 155.51  | 2021 |
| 213N | N | <i>Trapezia cymodoce</i>  | L | 2 | B TO M  | 4 | 155.51  | 2021 |
| 213N | N | <i>Trapezia cymodoce</i>  | M | 1 | M       | 4 | 155.51  | 2021 |
| 214D | D | <i>Trapezia cymodoce</i>  | L | 2 | B       | 5 | 2476.91 | 2021 |
| 214N | N | <i>Trapezia cymodoce</i>  | L | 2 | B TO M  | 5 | 2476.91 | 2021 |
| 214N | N | <i>Trapezia cymodoce</i>  | S | 2 | M TO UP | 5 | 2476.91 | 2021 |
| 214N | N | <i>Trapezia digitalis</i> | S | 2 | M TO UP | 5 | 2476.91 | 2021 |
| 214N | N | <i>Trapezia digitalis</i> | M | 2 | M       | 5 | 2476.91 | 2021 |
| 215D | D | <i>Trapezia cymodoce</i>  | M | 1 | UN      | 2 | 1.12    | 2021 |
| 215N | N | <i>Trapezia cymodoce</i>  | M | 1 | M       | 2 | 1.12    | 2021 |
| 216D | D | <i>Trapezia cymodoce</i>  | L | 2 | B       | 3 | 333.72  | 2021 |
| 216D | D | <i>Trapezia cymodoce</i>  | M | 1 | M       | 3 | 333.72  | 2021 |
| 216N | N | <i>Trapezia cymodoce</i>  | L | 2 | B TO M  | 3 | 333.72  | 2021 |
| 216N | N | <i>Trapezia cymodoce</i>  | M | 1 | M       | 3 | 333.72  | 2021 |

|      |   |                           |   |   |         |   |         |      |
|------|---|---------------------------|---|---|---------|---|---------|------|
| 216N | N | <i>Trapezia cymodoce</i>  | S | 1 | UP      | 3 | 333.72  | 2021 |
| 217D | D | <i>Trapezia cymodoce</i>  | M | 2 | UN      | 4 | 188.56  | 2021 |
| 217N | N | <i>Trapezia cymodoce</i>  | M | 2 | M       | 4 | 188.56  | 2021 |
| 218D | D | <i>Trapezia cymodoce</i>  | M | 2 | M       | 3 | 8.62    | 2021 |
| 218N | N | <i>Trapezia cymodoce</i>  | M | 2 | M       | 3 | 8.62    | 2021 |
| 219D | D | <i>Trapezia cymodoce</i>  | M | 1 | UN      | 2 | 0.90    | 2021 |
| 219N | N | <i>Trapezia cymodoce</i>  | M | 1 | UN      | 2 | 0.90    | 2021 |
| 220D | D | <i>Trapezia cymodoce</i>  | L | 2 | B       | 6 | 9521.29 | 2021 |
| 220N | N | <i>Trapezia cymodoce</i>  | L | 2 | B TO M  | 6 | 9521.29 | 2021 |
| 220N | N | <i>Trapezia cymodoce</i>  | M | 2 | M       | 6 | 9521.29 | 2021 |
| 220N | N | <i>Trapezia cymodoce</i>  | S | 1 | UP      | 6 | 9521.29 | 2021 |
| 221D | D | <i>Trapezia cymodoce</i>  | M | 1 | UN      | 3 | 30.85   | 2021 |
| 221N | N | <i>Trapezia cymodoce</i>  | M | 1 | M       | 3 | 30.85   | 2021 |
| 222D | D | <i>Trapezia cymodoce</i>  | S | 1 | UN      | 2 | 1.70    | 2021 |
| 222N | N | <i>Trapezia cymodoce</i>  | S | 1 | M       | 2 | 1.70    | 2021 |
| 223D | D | <i>Trapezia digitalis</i> | L | 2 | B       | 3 | 69.24   | 2021 |
| 223N | N | <i>Trapezia cymodoce</i>  | S | 1 | M       | 3 | 69.24   | 2021 |
| 223N | N | <i>Trapezia digitalis</i> | L | 2 | B TO M  | 3 | 69.24   | 2021 |
| 224D | D | <i>Trapezia cymodoce</i>  | L | 2 | B       | 4 | 3219.60 | 2021 |
| 224N | N | <i>Trapezia cymodoce</i>  | L | 2 | B TO M  | 4 | 3219.60 | 2021 |
| 224N | N | <i>Trapezia digitalis</i> | S | 1 | M TO UP | 4 | 3219.60 | 2021 |
| 224N | N | <i>Trapezia cymodoce</i>  | M | 1 | M TO UP | 4 | 3219.60 | 2021 |
| 225D | D | <i>Trapezia cymodoce</i>  | S | 1 | B       | 2 | 17.19   | 2021 |
| 225N | N | <i>Trapezia cymodoce</i>  | S | 1 | M       | 2 | 17.19   | 2021 |
| 226D | D | <i>Trapezia cymodoce</i>  | L | 2 | B       | 4 | 963.64  | 2021 |
| 226N | N | <i>Trapezia cymodoce</i>  | L | 2 | B TO M  | 4 | 963.64  | 2021 |
| 226N | N | <i>Trapezia cymodoce</i>  | M | 1 | M       | 4 | 963.64  | 2021 |
| 227D | D | <i>Trapezia cymodoce</i>  | L | 1 | B       | 3 | 6.74    | 2021 |
| 227N | N | <i>Trapezia cymodoce</i>  | M | 1 | M       | 3 | 6.74    | 2021 |
| 228D | D | <i>Trapezia cymodoce</i>  | L | 2 | B       | 4 | 1687.10 | 2021 |
| 228N | N | <i>Trapezia cymodoce</i>  | L | 2 | B TO M  | 4 | 1687.10 | 2021 |
| 228N | N | <i>Trapezia cymodoce</i>  | M | 2 | M       | 4 | 1687.10 | 2021 |
| 228N | N | <i>Trapezia cymodoce</i>  | S | 1 | UP      | 4 | 1687.10 | 2021 |
| 229D | D | <i>Trapezia cymodoce</i>  | L | 2 | B       | 3 | 968.37  | 2021 |
| 229N | N | <i>Trapezia cymodoce</i>  | L | 2 | B TO M  | 3 | 968.37  | 2021 |
| 229N | N | <i>Trapezia digitalis</i> | S | 1 | UP      | 3 | 968.37  | 2021 |
| 229N | N | <i>Trapezia cymodoce</i>  | S | 1 | M TO UP | 3 | 968.37  | 2021 |
| 229N | N | <i>Trapezia digitalis</i> | M | 1 | M       | 3 | 968.37  | 2021 |
| 230D | D | <i>Trapezia cymodoce</i>  | L | 2 | B       | 3 | 402.18  | 2021 |
| 230N | N | <i>Trapezia cymodoce</i>  | L | 2 | B TO M  | 3 | 402.18  | 2021 |
| 230N | N | <i>Trapezia cymodoce</i>  | S | 1 | UP      | 3 | 402.18  | 2021 |
| 231D | D | <i>Trapezia cymodoce</i>  | M | 1 | B       | 4 | 147.78  | 2021 |
| 231N | N | <i>Trapezia cymodoce</i>  | S | 1 | UP      | 4 | 147.78  | 2021 |
| 232D | D | <i>Trapezia cymodoce</i>  | L | 1 | B       | 3 | 131.19  | 2021 |
| 232D | D | <i>Trapezia cymodoce</i>  | M | 1 | B       | 3 | 131.19  | 2021 |
| 232N | N | <i>Trapezia cymodoce</i>  | L | 1 | B       | 3 | 131.19  | 2021 |
| 232N | N | <i>Trapezia cymodoce</i>  | M | 1 | UP      | 3 | 131.19  | 2021 |
| 233D | D | <i>Trapezia cymodoce</i>  | L | 2 | B       | 4 | 545.13  | 2021 |
| 233D | D | <i>Trapezia digitalis</i> | M | 2 | B       | 4 | 545.13  | 2021 |
| 233N | N | <i>Trapezia cymodoce</i>  | L | 2 | B       | 4 | 545.13  | 2021 |
| 233N | N | <i>Trapezia digitalis</i> | L | 2 | M       | 4 | 545.13  | 2021 |

|      |   |                           |   |   |         |   |         |      |
|------|---|---------------------------|---|---|---------|---|---------|------|
| 233N | N | <i>Trapezia digitalis</i> | S | 1 | M TO UP | 4 | 545.13  | 2021 |
| 234D | D | <i>Trapezia cymodoce</i>  | S | 1 | B       | 3 | 11.93   | 2021 |
| 234N | N | <i>Trapezia cymodoce</i>  | S | 1 | UP      | 3 | 11.93   | 2021 |
| 235D | D | <i>Trapezia cymodoce</i>  | L | 2 | B       | 5 | 1460.45 | 2021 |
| 235N | N | <i>Trapezia cymodoce</i>  | L | 2 | B TO M  | 5 | 1460.45 | 2021 |
| 235N | N | <i>Trapezia cymodoce</i>  | S | 2 | UP      | 5 | 1460.45 | 2021 |
| 235N | N | <i>Trapezia digitalis</i> | M | 2 | M       | 5 | 1460.45 | 2021 |
| 236D | D | <i>Trapezia cymodoce</i>  | L | 2 | B       | 3 | 269.65  | 2021 |
| 236N | N | <i>Trapezia cymodoce</i>  | L | 2 | B       | 3 | 269.65  | 2021 |
| 236N | N | <i>Trapezia cymodoce</i>  | M | 1 | M       | 3 | 269.65  | 2021 |
| 236N | N | <i>Trapezia cymodoce</i>  | S | 1 | UP      | 3 | 269.65  | 2021 |
| 237D | D | <i>Trapezia cymodoce</i>  | L | 2 | B       | 4 | 2070.65 | 2021 |
| 237N | N | <i>Trapezia cymodoce</i>  | L | 2 | B TO M  | 4 | 2070.65 | 2021 |
| 237N | N | <i>Trapezia cymodoce</i>  | M | 2 | M       | 4 | 2070.65 | 2021 |
| 237N | N | <i>Trapezia cymodoce</i>  | S | 1 | M TO UP | 4 | 2070.65 | 2021 |
| 237N | N | <i>Trapezia digitalis</i> | M | 2 | M       | 4 | 2070.65 | 2021 |
| 237N | N | <i>Trapezia digitalis</i> | S | 1 | UP      | 4 | 2070.65 | 2021 |
| 238D | D | <i>Trapezia cymodoce</i>  | M | 3 | B       | 4 | 362.71  | 2021 |
| 238N | N | <i>Trapezia cymodoce</i>  | M | 3 | B TO UP | 4 | 362.71  | 2021 |
| 239D | D | <i>Trapezia cymodoce</i>  | L | 2 | B       | 4 | 1707.56 | 2021 |
| 239N | N | <i>Trapezia cymodoce</i>  | M | 1 | M       | 4 | 1707.56 | 2021 |
| 239N | N | <i>Trapezia cymodoce</i>  | L | 2 | B TO M  | 4 | 1707.56 | 2021 |
| 239N | N | <i>Trapezia cymodoce</i>  | M | 1 | M       | 4 | 1707.56 | 2021 |
| 239N | N | <i>Trapezia cymodoce</i>  | S | 2 | M TO UP | 4 | 1707.56 | 2021 |
| 239N | N | <i>Trapezia digitalis</i> | S | 1 | UP      | 4 | 1707.56 | 2021 |
| 240D | D | <i>Trapezia cymodoce</i>  | M | 1 | UN      | 3 | 22.20   | 2021 |
| 240N | N | <i>Trapezia cymodoce</i>  | M | 1 | M       | 3 | 22.20   | 2021 |
| 241D | D | <i>Trapezia cymodoce</i>  | L | 2 | B       | 4 | 834.01  | 2021 |
| 241N | N | <i>Trapezia cymodoce</i>  | L | 2 | B       | 4 | 834.01  | 2021 |
| 241N | N | <i>Trapezia digitalis</i> | M | 2 | M       | 4 | 834.01  | 2021 |
| 242D | D | <i>Trapezia cymodoce</i>  | L | 1 | B       | 3 | 151.94  | 2021 |
| 242N | N | <i>Trapezia cymodoce</i>  | L | 1 | M       | 3 | 151.94  | 2021 |
| 243D | D | <i>Trapezia digitalis</i> | L | 1 | UN      | 3 | 103.07  | 2021 |
| 243N | N | <i>Trapezia digitalis</i> | L | 1 | M       | 3 | 103.07  | 2021 |
| 244D | D | <i>Trapezia cymodoce</i>  | M | 1 | UN      | 3 | 32.11   | 2021 |
| 244N | N | <i>Trapezia cymodoce</i>  | M | 1 | M       | 3 | 32.11   | 2021 |
| 245D | D | <i>Trapezia cymodoce</i>  | L | 2 | B       | 4 | 456.31  | 2021 |
| 245N | N | <i>Trapezia cymodoce</i>  | L | 2 | B TO M  | 4 | 456.31  | 2021 |
| 245N | N | <i>Trapezia digitalis</i> | M | 1 | UP      | 4 | 456.31  | 2021 |
| 245N | N | <i>Trapezia digitalis</i> | S | 1 | UP      | 4 | 456.31  | 2021 |
| 246D | D | <i>Trapezia cymodoce</i>  | L | 1 | B       | 3 | 235.24  | 2021 |
| 246N | N | <i>Trapezia cymodoce</i>  | L | 1 | B       | 3 | 235.24  | 2021 |
| 246N | N | <i>Trapezia cymodoce</i>  | M | 1 | M       | 3 | 235.24  | 2021 |
| 247N | N | <i>Trapezia cymodoce</i>  | S | 1 | M       | 2 | 12.55   | 2021 |
| 248D | D | <i>Trapezia cymodoce</i>  | L | 1 | B       | 3 | 347.84  | 2021 |
| 248D | D | <i>Trapezia cymodoce</i>  | M | 1 | B       | 3 | 347.84  | 2021 |
| 248N | N | <i>Trapezia cymodoce</i>  | L | 1 | M       | 3 | 347.84  | 2021 |
| 248N | N | <i>Trapezia cymodoce</i>  | M | 3 | M       | 3 | 347.84  | 2021 |
| 248N | N | <i>Trapezia cymodoce</i>  | M | 1 | UP      | 3 | 347.84  | 2021 |
| 248N | N | <i>Trapezia cymodoce</i>  | S | 1 | UP      | 3 | 347.84  | 2021 |
| 248N | N | <i>Trapezia digitalis</i> | M | 2 | M       | 3 | 347.84  | 2021 |

|      |   |                           |   |   |         |   |         |      |
|------|---|---------------------------|---|---|---------|---|---------|------|
| 249D | D | <i>Trapezia cymodoce</i>  | M | 2 | B       | 4 | 617.92  | 2021 |
| 249N | N | <i>Trapezia cymodoce</i>  | M | 1 | M       | 4 | 617.92  | 2021 |
| 249N | N | <i>Trapezia cymodoce</i>  | M | 1 | B       | 4 | 617.92  | 2021 |
| 250D | D | <i>Trapezia cymodoce</i>  | L | 2 | B       | 4 | 820.84  | 2021 |
| 250N | N | <i>Trapezia cymodoce</i>  | L | 2 | B       | 4 | 820.84  | 2021 |
| 251D | D | <i>Trapezia cymodoce</i>  | L | 1 | B       | 3 | 598.04  | 2021 |
| 251N | N | <i>Trapezia cymodoce</i>  | L | 1 | B       | 3 | 598.04  | 2021 |
| 251N | N | <i>Trapezia digitalis</i> | M | 1 | UP      | 3 | 598.04  | 2021 |
| 251N | N | <i>Trapezia digitalis</i> | S | 1 | UP      | 3 | 598.04  | 2021 |
| 251N | N | <i>Trapezia digitalis</i> | M | 1 | M       | 3 | 598.04  | 2021 |
| 252D | D | <i>Trapezia cymodoce</i>  | M | 2 | M       | 3 | 172.88  | 2021 |
| 252N | N | <i>Trapezia cymodoce</i>  | M | 2 | M       | 3 | 172.88  | 2021 |
| 253D | D | <i>Trapezia cymodoce</i>  | L | 2 | B       | 4 | 433.28  | 2021 |
| 253N | N | <i>Trapezia cymodoce</i>  | L | 2 | B TO M  | 4 | 433.28  | 2021 |
| 254N | N | <i>Trapezia cymodoce</i>  | M | 1 | M       | 3 | 39.31   | 2021 |
| 255D | D | <i>Trapezia cymodoce</i>  | L | 2 | B       | 3 | 298.85  | 2021 |
| 255N | N | <i>Trapezia cymodoce</i>  | L | 2 | B       | 3 | 298.85  | 2021 |
| 255N | N | <i>Trapezia cymodoce</i>  | S | 1 | UP      | 3 | 298.85  | 2021 |
| 255N | N | <i>Trapezia cymodoce</i>  | M | 1 | UN      | 3 | 298.85  | 2021 |
| 256N | N | <i>Trapezia cymodoce</i>  | S | 1 | UP      | 2 | 10.81   | 2021 |
| 257D | D | <i>Trapezia digitalis</i> | L | 2 | M       | 3 | 108.26  | 2021 |
| 257N | N | <i>Trapezia digitalis</i> | L | 2 | M       | 3 | 108.26  | 2021 |
| 257N | N | <i>Trapezia digitalis</i> | M | 1 | M       | 3 | 108.26  | 2021 |
| 257N | N | <i>Trapezia digitalis</i> | S | 2 | UP      | 3 | 108.26  | 2021 |
| 258D | D | <i>Trapezia digitalis</i> | M | 2 | B       | 2 | 53.48   | 2021 |
| 258N | N | <i>Trapezia digitalis</i> | M | 2 | M       | 2 | 53.48   | 2021 |
| 259D | D | <i>Trapezia cymodoce</i>  | L | 2 | B       | 3 | 192.47  | 2021 |
| 259N | N | <i>Trapezia cymodoce</i>  | L | 2 | B       | 3 | 192.47  | 2021 |
| 259N | N | <i>Trapezia cymodoce</i>  | S | 1 | UP      | 3 | 192.47  | 2021 |
| 259N | N | <i>Trapezia digitalis</i> | S | 1 | UP      | 3 | 192.47  | 2021 |
| 259N | N | <i>Trapezia digitalis</i> | L | 2 | B       | 3 | 192.47  | 2021 |
| 260D | D | <i>Trapezia digitalis</i> | L | 2 | B       | 4 | 206.17  | 2021 |
| 260N | N | <i>Trapezia digitalis</i> | L | 2 | M       | 4 | 206.17  | 2021 |
| 260N | N | <i>Trapezia cymodoce</i>  | M | 1 | M TO UP | 4 | 206.17  | 2021 |
| 260N | N | <i>Trapezia digitalis</i> | S | 2 | UP      | 4 | 206.17  | 2021 |
| 260N | N | <i>Trapezia cymodoce</i>  | S | 1 | M TO UP | 4 | 206.17  | 2021 |
| 261N | N | <i>Trapezia cymodoce</i>  | M | 1 | M       | 3 | 59.38   | 2021 |
| 262D | D | <i>Trapezia cymodoce</i>  | L | 2 | B       | 5 | 1595.57 | 2021 |
| 262N | N | <i>Trapezia cymodoce</i>  | L | 2 | M TO UP | 5 | 1595.57 | 2021 |
| 262N | N | <i>Trapezia cymodoce</i>  | M | 1 | M       | 5 | 1595.57 | 2021 |
| 262N | N | <i>Trapezia digitalis</i> | M | 1 | UP      | 5 | 1595.57 | 2021 |
| 263D | D | <i>Trapezia cymodoce</i>  | M | 1 | B       | 3 | 65.37   | 2021 |
| 263N | N | <i>Trapezia cymodoce</i>  | M | 1 | M       | 3 | 65.37   | 2021 |
| 263N | N | <i>Trapezia cymodoce</i>  | S | 1 | UP      | 3 | 65.37   | 2021 |
| 263N | N | <i>Trapezia digitalis</i> | S | 1 | UP      | 3 | 65.37   | 2021 |
| 263N | N | <i>Trapezia digitalis</i> | M | 1 | M       | 3 | 65.37   | 2021 |
| 264N | N | <i>Trapezia cymodoce</i>  | M | 1 | M       | 3 | 208.41  | 2021 |
| 265N | N | <i>Trapezia cymodoce</i>  | M | 2 | M       | 3 | 108.95  | 2021 |
| 266N | N | <i>Trapezia digitalis</i> | S | 1 | UP      | 2 | 2.54    | 2021 |
| 267D | D | <i>Trapezia cymodoce</i>  | L | 2 | B       | 3 | 91.54   | 2021 |
| 267N | N | <i>Trapezia cymodoce</i>  | L | 2 | B TO M  | 3 | 91.54   | 2021 |

|      |   |                           |   |   |         |   |         |      |
|------|---|---------------------------|---|---|---------|---|---------|------|
| 267N | N | <i>Trapezia digitalis</i> | M | 2 | M       | 3 | 91.54   | 2021 |
| 268D | D | <i>Trapezia cymodoce</i>  | L | 1 | B       | 3 | 321.49  | 2021 |
| 268N | N | <i>Trapezia digitalis</i> | L | 1 | M       | 3 | 321.49  | 2021 |
| 268N | N | <i>Trapezia digitalis</i> | L | 2 | M       | 3 | 321.49  | 2021 |
| 268N | N | <i>Trapezia cymodoce</i>  | L | 1 | B       | 3 | 321.49  | 2021 |
| 268N | N | <i>Trapezia digitalis</i> | S | 1 | UP      | 3 | 321.49  | 2021 |
| 268N | N | <i>Trapezia cymodoce</i>  | S | 1 | UP      | 3 | 321.49  | 2021 |
| 268N | N | <i>Trapezia cymodoce</i>  | M | 1 | M       | 3 | 321.49  | 2021 |
| 269D | D | <i>Trapezia cymodoce</i>  | L | 2 | B       | 4 | 107.60  | 2021 |
| 269D | D | <i>Trapezia digitalis</i> | M | 1 | UN      | 4 | 107.60  | 2021 |
| 269N | N | <i>Trapezia cymodoce</i>  | L | 2 | B TO M  | 4 | 107.60  | 2021 |
| 269N | N | <i>Trapezia cymodoce</i>  | S | 1 | UP      | 4 | 107.60  | 2021 |
| 269N | N | <i>Trapezia digitalis</i> | S | 1 | UP      | 4 | 107.60  | 2021 |
| 269N | N | <i>Trapezia digitalis</i> | M | 2 | M       | 4 | 107.60  | 2021 |
| 269N | N | <i>Trapezia cymodoce</i>  | M | 1 | M       | 4 | 107.60  | 2021 |
| 270D | D | <i>Trapezia cymodoce</i>  | M | 1 | B       | 3 | 34.01   | 2021 |
| 270N | N | <i>Trapezia cymodoce</i>  | M | 1 | B       | 3 | 34.01   | 2021 |
| 271D | D | <i>Trapezia cymodoce</i>  | L | 2 | B       | 3 | 220.02  | 2021 |
| 271N | N | <i>Trapezia cymodoce</i>  | L | 2 | B       | 3 | 220.02  | 2021 |
| 271N | N | <i>Trapezia cymodoce</i>  | M | 1 | M       | 3 | 220.02  | 2021 |
| 271N | N | <i>Trapezia digitalis</i> | M | 1 | M       | 3 | 220.02  | 2021 |
| 272N | N | <i>Trapezia cymodoce</i>  | M | 2 | M       | 3 | 105.29  | 2021 |
| 273N | N | <i>Trapezia digitalis</i> | M | 1 | UP      | 2 | 16.26   | 2021 |
| 274N | N | <i>Trapezia digitalis</i> | M | 1 | M       | 2 | 12.86   | 2021 |
| 275D | D | <i>Trapezia cymodoce</i>  | L | 2 | B       | 3 | 108.94  | 2021 |
| 275N | N | <i>Trapezia cymodoce</i>  | L | 2 | M       | 3 | 108.94  | 2021 |
| 276D | D | <i>Trapezia cymodoce</i>  | L | 2 | B       | 3 | 485.19  | 2021 |
| 276N | N | <i>Trapezia cymodoce</i>  | L | 2 | B TO M  | 3 | 485.19  | 2021 |
| 276N | N | <i>Trapezia cymodoce</i>  | M | 1 | B       | 3 | 485.19  | 2021 |
| 277D | D | <i>Trapezia cymodoce</i>  | L | 2 | B       | 5 | 1432.28 | 2021 |
| 277D | D | <i>Trapezia digitalis</i> | M | 2 | M       | 5 | 1432.28 | 2021 |
| 277N | N | <i>Trapezia cymodoce</i>  | L | 2 | B       | 5 | 1432.28 | 2021 |
| 277N | N | <i>Trapezia digitalis</i> | M | 2 | M       | 5 | 1432.28 | 2021 |
| 277N | N | <i>Trapezia cymodoce</i>  | M | 2 | M       | 5 | 1432.28 | 2021 |
| 277N | N | <i>Trapezia cymodoce</i>  | S | 1 | M TO UP | 5 | 1432.28 | 2021 |
| 277N | N | <i>Trapezia digitalis</i> | S | 1 | UP      | 5 | 1432.28 | 2021 |
| 278N | N | <i>Trapezia cymodoce</i>  | M | 2 | M       | 3 | 306.47  | 2021 |
| 278N | N | <i>Trapezia cymodoce</i>  | M | 1 | UP      | 3 | 306.47  | 2021 |
| 278N | N | <i>Trapezia digitalis</i> | S | 1 | UP      | 3 | 306.47  | 2021 |
| 279N | N | <i>Trapezia cymodoce</i>  | M | 1 | B TO M  | 3 | 31.16   | 2021 |
| 279N | N | <i>Trapezia cymodoce</i>  | S | 1 | UN      | 3 | 31.16   | 2021 |
| 262D | D | <i>Trapezia digitalis</i> | S | 5 | UN      | 1 | 1595.57 | 2021 |
| 233D | D | <i>Trapezia digitalis</i> | S | 4 | B       | 1 | 545.13  | 2021 |
| 211D | D | <i>Trapezia digitalis</i> | S | 4 | UN      | 2 | 540.32  | 2021 |
| 203D | D | <i>Trapezia digitalis</i> | S | 6 | UN      | 1 | 5722.73 | 2021 |

**Table S3.** Summary results of two-ways PERMANOVA for *Trapezia cymodoce*. *Trapezia* body size grouped by day and night ('Size'), and year (2020-2021), were used as the fixed effects, and coral canopy sample ID was considered as a random effect. Asterisk indicates statistical significance. .

| Two-Way PERMANOVA |     |           |         |         |         |           |
|-------------------|-----|-----------|---------|---------|---------|-----------|
|                   | Df  | SumsOfSqs | MeanSqs | F.Model | R2      | Pr(>F)    |
| Size              | 5   | 5.0537    | 1.01074 | 41.756  | 0.33392 | 0.001 *** |
| Year              | 1   | 0.0592    | 0.0592  | 2.446   | 0.00391 | 0.71      |
| Residuals         | 414 | 10.0213   | 0.02421 |         | 0.66216 |           |
| Total             | 420 | 15.1342   |         |         | 1       |           |

**Table S4.** Summary results of two-ways PERMANOVA for *Trapezia digitalis*. *Trapezia* body size grouped by day and night ('Size'), and year (2020-2021), were used as the fixed effects, and coral canopy sample ID was considered as a random effect. Asterisk indicates statistical significance. .

| Two-Way PERMANOVA |     |           |         |         |         |           |
|-------------------|-----|-----------|---------|---------|---------|-----------|
|                   | Df  | SumsOfSqs | MeanSqs | F.Model | R2      | Pr(>F)    |
| Size              | 5   | 1.9367    | 0.38735 | 18.358  | 0.37426 | 0.001 *** |
| year              | 1   | 0.0519    | 0.05195 | 2.462   | 0.01004 | 0.093 .   |
| Residuals         | 151 | 3.1861    | 0.0211  |         | 0.6157  |           |
| Total             | 157 | 5.1748    |         |         | 1       |           |

**Table S5.** Summary results of two-ways PERMANOVA between *Trapezia cymodoce* and *Trapezia digitalis*. *Trapezia* body size ('Size'), and species, were used as the fixed effects, and coral canopy sample ID was considered as a random effect. Asterisk indicates statistical significance. .

| Two-Way PERMANOVA |     |           |         |         |         |           |
|-------------------|-----|-----------|---------|---------|---------|-----------|
|                   | Df  | SumsOfSqs | MeanSqs | F.Model | R2      | Pr(>F)    |
| Size              | 11  | 7.9887    | 0.72625 | 30.932  | 0.37503 | 0.001 *** |
| Residuals         | 567 | 13.3127   | 0.02348 |         | 0.62497 |           |
| Total             | 578 | 21.3014   |         |         | 1       |           |

**Table S6.** Summary results of two-ways PERMANOVA for *Trapezia cymodoce*. *Trapezia* body size ('Size'), time of day ('D/N', day and night), were used as the fixed effects, and coral canopy sample ID was considered as a random effect. Asterisk indicates statistical significance. .

| Two-Ways PERMANOVA |     |           |          |         |         |           |
|--------------------|-----|-----------|----------|---------|---------|-----------|
|                    | Df  | SumsOfSqs | Mean Sqs | F.Model | R2      | Pr(>F)    |
| Size               | 2   | 2.422     | 1.21099  | 49.869  | 0.16003 | 0.001 *** |
| D/N                | 1   | 2.1556    | 2.15557  | 88.767  | 0.14243 | 0.001 *** |
| Size:D/N           | 2   | 0.4791    | 0.23954  | 9.864   | 0.03165 | 0.001 *** |
| Residuals          | 415 | 10.0776   | 0.02428  |         | 0.66588 |           |
| Total              | 420 | 15.1342   |          |         | 1       |           |

**Table S7.** Summary results of two-ways PERMANOVA for *Trapezia digitalis*. *Trapezia* body size ('Size'), time of day ('D/N', day and night), were used as the fixed effects, and coral canopy sample ID was considered as a random effect. Asterisk indicates statistical significance.

| Two-Way PERMANOVA |     |           |         |         |         |           |
|-------------------|-----|-----------|---------|---------|---------|-----------|
|                   | Df  | SumsOfSqs | MeanSqs | F.Model | R2      | Pr(>F)    |
| Size              | 2   | 1.1489    | 0.57443 | 26.9643 | 0.22201 | 0.001 *** |
| D/N               | 1   | 0.5679    | 0.56794 | 26.6597 | 0.10975 | 0.001 *** |
| size:D/N          | 2   | 0.2199    | 0.10997 | 5.1623  | 0.0425  | 0.001 *** |
| Residuals         | 152 | 3.2381    | 0.0213  |         | 0.62574 |           |
| Total             | 157 | 5.1748    |         |         | 1       |           |

**Table S8.** Summary results of pairwise permutation MANOVA with false discovery rate adjustment (FDR) for *Trapezia cymodoce* and *Trapezia digitalis*. (D-L) day large; (D-M) day medium; (D-S) day small; (N-L) night large; (N-M) night medium; (N-S) night small; (c) *T. cymodoce*; (d) *T. digitalis*.

|       | D-L-d  | D-L-c  | D-M-d  | D-M-c  | D-S-d  | D-S-c  | N-L-d  | N-L-c  | N-M-d  | N-M-c  | N-S-d  |
|-------|--------|--------|--------|--------|--------|--------|--------|--------|--------|--------|--------|
| D-L-c | 0.0084 | -      | -      | -      | -      | -      | -      | -      | -      | -      | -      |
| D-M-d | 0.7714 | 0.0018 | -      | -      | -      | -      | -      | -      | -      | -      | -      |
| D-M-c | 0.946  | 0.0018 | 0.4961 | -      | -      | -      | -      | -      | -      | -      | -      |
| D-S-d | 0.072  | 0.0018 | 0.0032 | 0.055  | -      | -      | -      | -      | -      | -      | -      |
| D-S-c | 0.7522 | 0.0096 | 0.49   | 0.9067 | 0.1331 | -      | -      | -      | -      | -      | -      |
| N-L-d | 0.1061 | 0.0018 | 0.0045 | 0.0106 | 0.0072 | 0.0324 | -      | -      | -      | -      | -      |
| N-L-c | 0.0116 | 0.0018 | 0.0018 | 0.0018 | 0.0059 | 0.0165 | 0.0032 | -      | -      | -      | -      |
| N-M-d | 0.0018 | 0.0018 | 0.0018 | 0.0018 | 0.0032 | 0.0045 | 0.5226 | 0.0018 | -      | -      | -      |
| N-M-c | 0.0106 | 0.0018 | 0.0018 | 0.0018 | 0.0032 | 0.0045 | 0.7356 | 0.0018 | 0.1077 | -      | -      |
| N-S-d | 0.0018 | 0.0018 | 0.0018 | 0.0018 | 0.0018 | 0.0018 | 0.0018 | 0.0018 | 0.0018 | 0.0018 | -      |
| NS-c  | 0.0018 | 0.0018 | 0.0018 | 0.0018 | 0.0032 | 0.0018 | 0.0018 | 0.0018 | 0.0018 | 0.0018 | 0.0018 |

**Table S9.** Summary results of pairwise permutation MANOVA with false discovery rate adjustment (FDR) for *Trapezia cymodoce*. (D-L) day large; (D-M) day medium; (D-S) day small; (N-L) night large; (N-M) night medium; (N-S) night small. Asterisk indicates statistical significance. .

|     | D-L     | D-M     | D-S     | N-L     | N-M     |
|-----|---------|---------|---------|---------|---------|
| D-M | 0.0014* | -       | -       | -       | -       |
| D-S | 0.0058* | 0.875   | -       | -       | -       |
| N-L | 0.0014* | 0.0014* | 0.0182* | -       | -       |
| N-M | 0.0014* | 0.0014* | 0.0037* | 0.0014* | -       |
| N-S | 0.0014* | 0.0014* | 0.0014* | 0.0014* | 0.0014* |

**Table S10.** Summary results of pairwise permutation MANOVA with false discovery rate adjustment (FDR) for *Trapezia digitalis*. (D-L) day large; (D-M) day medium; (D-S) day small; (N-L) night large; (N-M) night medium; (N-S) night small. Asterisk indicates statistical significance. .

|     | D-L     | D-M     | D-S     | N-L     | N-M     |
|-----|---------|---------|---------|---------|---------|
| D-M | 0.729   | -       | -       | -       | -       |
| D-S | 0.07*   | 0.0037* | -       | -       | -       |
| N-L | 0.0969  | 0.0075* | 0.0123* | -       | -       |
| N-M | 0.0037* | 0.0025* | 0.005*  | 0.5143  | -       |
| N-S | 0.0025* | 0.0025* | 0.0025* | 0.0025* | 0.0025* |

**Table S11.** Compartment usage summary (ex.1) of different *Trapezia cymodoce* body size crabs (medium and small) at day and night with and without *T. cymodoce* (n=21). Status – with and without the presence of large *T. cymodoce* large pair; D/N-day/night; Size - *T. cymodoce* carapace width L – large, M – medium, S - small (*T. cymodoce* >2 cm= large, 1–2 cm= medium, <1 cm= small; Canopy compartment (Un) understory; (B) base; (B-M) base, and middle; (B-Up) base, middle, and up; (M) middle; (M-Up) middle and up compartments; Sum – total individual participant in experiment.

| <i>T. cymodoce</i> —All Sizes Together (Medium and Small) |     |      |    |    |       |        |    |        |    |     |
|-----------------------------------------------------------|-----|------|----|----|-------|--------|----|--------|----|-----|
| Status                                                    | D/N | Size | Un | B  | B – M | B - Up | M  | M - Up | Up | sum |
| Without-L                                                 | D   | M    | 5  | 5  | 0     | 0      | 14 | 0      | 1  | 25  |
|                                                           | D   | S    | 12 | 3  | 0     | 0      | 0  | 0      | 0  | 15  |
|                                                           | N   | M    | 0  | 0  | 1     | 0      | 22 | 1      | 1  | 25  |
|                                                           | N   | S    | 0  | 0  | 0     | 0      | 2  | 0      | 13 | 15  |
|                                                           | D   | M    | 14 | 2  | 0     | 0      | 9  | 0      | 0  | 25  |
|                                                           | D   | S    | 13 | 2  | 0     | 0      | 0  | 0      | 0  | 15  |
| With-L                                                    | N   | M    | 0  | 0  | 0     | 0      | 23 | 0      | 2  | 25  |
|                                                           | N   | S    | 0  | 0  | 0     | 0      | 2  | 0      | 13 | 15  |
|                                                           | D   | L    | 1  | 27 | 3     | 2      | 6  | 0      | 0  | 39  |
|                                                           | N   | L    | 1  | 23 | 5     | 0      | 10 | 0      | 0  | 39  |

**Table S12.** Compartment usage summary of *Trapezia cymodoce* medium size at day and night with and without *T. cymodoce* large pair/coral (n=21). Status – with and without the presence of large *T. cymodoce* large pair; D/N-day/night; Size - *T. cymodoce* carapace width L – large, M – medium; Canopy compartment: (Un) understory; (B) base; (M) middle; (B-M) base, and middle; (B-Up) base, middle, and up; (M-Up) middle and up compartments.

| <i>T. cymodoce</i> —Medium |     |      |    |    |        |         |    |         |    |     |
|----------------------------|-----|------|----|----|--------|---------|----|---------|----|-----|
| Status                     | D/N | Size | UN | B  | B TO M | B TO UP | M  | M TO UP | UP | SUM |
| Without-L                  | D   | M    | 8  | 7  | 0      | 0       | 6  | 0       | 0  | 21  |
|                            | N   | M    | 0  | 0  | 0      | 0       | 20 | 0       | 1  | 21  |
|                            | D   | M    | 12 | 2  | 0      | 0       | 7  | 0       | 0  | 21  |
|                            | N   | M    | 0  | 0  | 0      | 0       | 20 | 0       | 1  | 21  |
| With-L                     | D   | L    | 1  | 29 | 3      | 2       | 7  | 0       | 0  | 42  |
|                            | N   | L    | 0  | 20 | 7      | 0       | 15 | 0       | 0  | 42  |

**Table S13.** Compartment usage summary of *Trapezia cymodoce* small size at day and night with and without *T. cymodoce* large pair/coral (n=15). Status – with and without the presence of large *T. cymodoce* large pair; D/N-day/night; Size - *T. cymodoce* carapace width L – large, S - small; Canopy compartment: (Un) understory; (B) base; (M) middle; (B-M) base, and middle; (B-Up) base, middle, and up; (M-Up) middle and up compartments.

| <i>T. cymodoce</i> —Small |     |      |    |    |        |         |    |         |    |     |
|---------------------------|-----|------|----|----|--------|---------|----|---------|----|-----|
| Status                    | D/N | Size | UN | B  | B TO M | B TO UP | M  | M TO UP | UP | SUM |
| Without-L                 | D   | S    | 11 | 1  | 0      | 0       | 3  | 0       | 0  | 15  |
|                           | N   | S    | 0  | 0  | 0      | 0       | 1  | 2       | 12 | 15  |
| With-L                    | D   | S    | 13 | 2  | 0      | 0       | 0  | 0       | 0  | 15  |
|                           | N   | S    | 0  | 0  | 0      | 0       | 2  | 0       | 13 | 15  |
|                           | D   | L    | 1  | 20 | 5      | 0       | 4  | 0       | 0  | 30  |
|                           | N   | L    | 0  | 10 | 10     | 0       | 10 | 0       | 0  | 30  |



**Table S14.** Compartment usage summary of *Trapezia digitalis* medium size at day and night with and without *T. cymodoce* large pair/coral (n=14). Status – with and without the presence of large *T. cymodoce* large pair; D/N-day/night; Size -*Trapezia* carapace width: M - medium *T. digitalis*, L – large *T. cymodoce* (*T. digitalis* medium 1–1.5 cm); Canopy compartment: (Un) understory; (B) base; (M) middle; (B-M) base, and middle; (B-Up) base, middle, and up; (M-Up) middle and up compartments.

| <i>T. digitalis</i> —Medium |         |      |    |    |     |      |    |      |    |     |
|-----------------------------|---------|------|----|----|-----|------|----|------|----|-----|
| Status                      | D/N     | Size | UN | B  | B-M | B-UP | M  | M-UP | UP | SUM |
| Without-L                   | D Total | M    | 0  | 1  | 0   | 0    | 12 | 0    | 1  | 14  |
|                             | N Total | M    | 0  | 0  | 0   | 1    | 12 | 0    | 1  | 14  |
| With-L                      | D Total | M    | 8  | 2  | 0   | 0    | 4  | 0    | 0  | 14  |
|                             | N Total | M    | 1  | 0  | 0   | 0    | 8  | 5    | 0  | 14  |
|                             | D Total | L    | 1  | 19 | 5   | 0    | 3  | 0    | 0  | 28  |
|                             | N Total | L    | 0  | 11 | 4   | 0    | 12 | 0    | 1  | 28  |

**Table S15.** Compartment usage summary of *Trapezia digitalis* small size at day and night with and without *T. cymodoce* large pair/coral (n=11). Status – with and without the presence of large *T. cymodoce* large pair; D/N-day/night; Size -*Trapezia* carapace width: S – small *T. digitalis*, L – large *T. cymodoce* (*T. digitalis* small <1 cm); Canopy compartment: (Un) understory; (B) base; (M) middle; (B-M) base, and middle; (B-Up) base, middle, and up; (M-Up) middle and up compartments.

| <i>T. digitalis</i> Small |         |      |    |    |     |      |   |      |    |     |
|---------------------------|---------|------|----|----|-----|------|---|------|----|-----|
| Status                    | D_N     | Size | UN | B  | B-M | B-UP | M | M-UP | UP | SUM |
| Without-L                 | D Total | S    | 4  | 2  | 0   | 0    | 5 | 0    | 0  | 11  |
|                           | N Total | S    | 0  | 0  | 0   | 0    | 0 | 1    | 10 | 11  |
| With-L                    | D Total | S    | 3  | 2  | 0   | 0    | 3 | 0    | 3  | 11  |
|                           | N Total | S    | 0  | 0  | 0   | 0    | 1 | 2    | 8  | 11  |
|                           | D Total | L    | 1  | 13 | 2   | 0    | 6 | 0    | 0  | 22  |
|                           | N Total | L    | 1  | 9  | 3   | 0    | 9 | 0    | 0  | 22  |

**Table S16.** Summary results of two-ways PERMANOVA for experiment 1, *T. cymodoce* all sizes (small, medium, and large). *Trapezia* body size ('Size') and day and night ('D/N') were used as the fixed effects, and coral canopy sample ID was considered as a random effect. Asterisk indicates statistical significance.

| <i>T. cymodoce</i> — All Sizes Together (Medium and Small) |     |           |         |         |         |           |
|------------------------------------------------------------|-----|-----------|---------|---------|---------|-----------|
|                                                            | Df  | SumsOfSqs | MeanSqs | F.Model | R2      | Pr(>F)    |
| Size                                                       | 2   | 3.578     | 1.78899 | 56.774  | 0.36552 | 0.001 *** |
| D/N                                                        | 1   | 1.1242    | 1.1242  | 35.676  | 0.11485 | 0.001 *** |
| Size:D/N                                                   | 2   | 0.738     | 0.36898 | 11.71   | 0.07539 | 0.001 *** |
| Residuals                                                  | 138 | 4.3485    | 0.03151 |         | 0.44424 |           |
| Total                                                      | 143 | 9.7886    |         |         | 1       |           |

**Table S17.** Summary results of two-ways PERMANOVA for experiment 1, *T. cymodoce* all sizes (small, medium, and large). *Trapezia* body size ('Size') and present/absence of large crabs were used as the fixed effects, and coral canopy sample ID was considered as a random effect. Asterisk indicates statistical significance. .

| <i>T. cymodoce</i> —All sizes together (Medium and Small) |     |           |         |         |         |           |
|-----------------------------------------------------------|-----|-----------|---------|---------|---------|-----------|
|                                                           | Df  | SumsOfSqs | MeanSqs | F.Model | R2      | Pr(>F)    |
| Size                                                      | 5   | 5.4401    | 1.08803 | 34.665  | 0.55576 | 0.001 *** |
| present/absence L                                         | 1   | 0.0485    | 0.04853 | 1.546   | 0.00496 | 0.231     |
| Residuals                                                 | 137 | 4.3       | 0.03139 |         | 0.43928 |           |
| Total                                                     | 143 | 9.7886    |         |         | 1       |           |

**Table S18.** Summary results of two-ways PERMANOVA for experiment 2, *T. cymodoce* large and medium sizes. *Trapezia* body size ('Size') and day and night ('D/N') were used as the fixed effects, and coral canopy sample ID was considered as a random effect. Asterisk indicates statistical significance. .

| <i>T. cymodoce</i> —Medium |     |           |         |         |         |           |
|----------------------------|-----|-----------|---------|---------|---------|-----------|
|                            | Df  | SumsOfSqs | MeanSqs | F.Model | R2      | Pr(>F)    |
| Size                       | 1   | 1.3573    | 1.35726 | 55.636  | 0.26408 | 0.001 *** |
| D/N                        | 1   | 0.7771    | 0.77707 | 31.853  | 0.15119 | 0.001 *** |
| Size:D/N                   | 1   | 0.029     | 0.02902 | 1.189   | 0.00565 | 0.351     |
| Residuals                  | 122 | 2.9762    | 0.0244  |         | 0.57908 |           |
| Total                      | 125 | 5.1396    |         |         | 1       |           |

**Table S19.** Summary results of two-ways PERMANOVA for experiment 2, *T. cymodoce* large with medium sizes. *Trapezia* body size ('Size') and present/absence of large crabs were used as the fixed effects, and coral canopy sample ID was considered as a random effect. Asterisk indicates statistical significance. .

| <i>T. cymodoce</i> —Medium |     |           |         |         |         |           |
|----------------------------|-----|-----------|---------|---------|---------|-----------|
|                            | Df  | SumsOfSqs | MeanSqs | F.Model | R2      | Pr(>F)    |
| Size                       | 3   | 2.1634    | 0.72112 | 29.5407 | 0.42092 | 0.001 *** |
| present/absence L          | 1   | 0.0225    | 0.0225  | 0.9217  | 0.00438 | 0.416     |
| Residuals                  | 121 | 2.9537    | 0.02441 |         | 0.5747  |           |
| Total                      | 125 | 5.1396    |         |         | 1       |           |

**Table S20.** Summary results of two-ways PERMANOVA for experiment 3, *T. cymodoce* large and small sizes. *Trapezia* body size ('Size') and day and night ('D/N') were used as the fixed effects, and coral canopy sample ID was considered as a random effect. Asterisk indicates statistical significance. .

| <i>T. cymodoce</i> —Small |    |           |         |         |         |           |
|---------------------------|----|-----------|---------|---------|---------|-----------|
|                           | Df | SumsOfSqs | MeanSqs | F.Model | R2      | Pr(>F)    |
| size                      | 1  | 1.6559    | 1.65591 | 79.66   | 0.36242 | 0.001 *** |
| DN                        | 1  | 0.7366    | 0.73657 | 35.434  | 0.16121 | 0.001 *** |
| size:DN                   | 1  | 0.3888    | 0.38882 | 18.705  | 0.0851  | 0.001 *** |
| Residuals                 | 86 | 1.7877    | 0.02079 |         | 0.39127 |           |

|       |    |       |   |
|-------|----|-------|---|
| Total | 89 | 4.569 | 1 |
|-------|----|-------|---|

**Table S21.** Summary results of two-ways PERMANOVA for experiment 3, *T. cymodoce* large with small sizes. *Trapezia* body size ('Size') and present/absence of large crabs were used as the fixed effects, and coral canopy sample ID was considered as a random effect. Asterisk indicates statistical significance.

| <i>T. cymodoce</i> —Small |    |           |         |         |         |           |
|---------------------------|----|-----------|---------|---------|---------|-----------|
|                           | Df | SumsOfSqs | MeanSqs | F.Model | R2      | Pr(>F)    |
| Size                      | 3  | 2.7813    | 0.9271  | 44.341  | 0.60873 | 0.001 *** |
| present/absence           | 1  | 0.0105    | 0.0105  | 0.502   | 0.0023  | 0.727     |
| Residuals                 | 85 | 1.7772    | 0.02091 |         | 0.38897 |           |
| Total                     | 89 | 4.569     |         |         | 1       |           |

**Table S22.** Summary results of two-ways PERMANOVA for experiment 4, *T. cymodoce* large size with *T. digitalis* medium size. *Trapezia* body size ('Size') and day and night ('D/N') were used as the fixed effects, and coral canopy sample ID was considered as a random effect. Asterisk indicates statistical significance. .

| <i>T. digitalis</i> —Medium |     |           |         |         |         |           |
|-----------------------------|-----|-----------|---------|---------|---------|-----------|
|                             | Df  | SumsOfSqs | MeanSqs | F.Model | R2      | Pr(>F)    |
| Size                        | 1   | 0.227     | 0.22696 | 8.07    | 0.05087 | 0.002 **  |
| DN                          | 1   | 1.2955    | 1.29547 | 46.066  | 0.29038 | 0.001 *** |
| size:DN                     | 1   | 0.0704    | 0.07038 | 2.503   | 0.01578 | 0.082 .   |
| Residuals                   | 102 | 2.8685    | 0.02812 |         | 0.64297 |           |
| Total                       | 105 | 4.4613    |         |         | 1       |           |

**Table S23.** Summary results of two-ways PERMANOVA for experiment 4, *T. cymodoce* large with *T. digitalis* medium sizes. *Trapezia* body size ('Size') and present/absence of large crabs were used as the fixed effects, and coral canopy sample ID was considered as a random effect. Asterisk indicates statistical significance. .

| <i>T. digitalis</i> —Medium |     |           |         |         |         |           |
|-----------------------------|-----|-----------|---------|---------|---------|-----------|
|                             | Df  | SumsOfSqs | MeanSqs | F.Model | R2      | Pr(>F)    |
| Size                        | 3   | 1.5928    | 0.53094 | 20.1388 | 0.35703 | 0.001 *** |
| present/absence             | 1   | 0.2057    | 0.20571 | 7.8029  | 0.04611 | 0.002 **  |
| Residuals                   | 101 | 2.6627    | 0.02636 |         | 0.59686 |           |
| Total                       | 105 | 4.4613    |         |         | 1       |           |

**Table S24.** Summary results of two-ways PERMANOVA for experiment 5, *T. cymodoce* large size with *T. digitalis* small size. *Trapezia* body size ('Size') and day and night ('D/N') were used as the fixed effects, and coral canopy sample ID was considered as a random effect. Asterisk indicates statistical significance. .

| <i>T. digitalis</i> —Small |    |           |         |         |         |           |
|----------------------------|----|-----------|---------|---------|---------|-----------|
|                            | Df | SumsOfSqs | MeanSqs | F.Model | R2      | Pr(>F)    |
| size                       | 1  | 0.2718    | 0.27183 | 9.478   | 0.05713 | 0.001 *** |
| DN                         | 1  | 1.604     | 1.60403 | 55.928  | 0.33711 | 0.001 *** |
| size:DN                    | 1  | 0.3011    | 0.30105 | 10.497  | 0.06327 | 0.001 *** |
| Residuals                  | 90 | 2.5812    | 0.02868 |         | 0.54249 |           |

|       |    |        |   |
|-------|----|--------|---|
| Total | 93 | 4.7581 | 1 |
|-------|----|--------|---|

**Table S25.** Summary results of two-ways PERMANOVA for experiment 5, *T. cymodoce* large with *T. digitalis* small sizes. *Trapezia* body size ('Size') and present/absence of large crabs were used as the fixed effects, and coral canopy sample ID was considered as a random effect Asterisk indicates statistical significance. .

| <i>T. digitalis</i> —Small |    |           |         |         |         |           |
|----------------------------|----|-----------|---------|---------|---------|-----------|
|                            | Df | SumsOfSqs | MeanSqs | F.Model | R2      | Pr(>F)    |
| Size                       | 3  | 2.1769    | 0.72564 | 25.0596 | 0.45751 | 0.001 *** |
| dominant                   | 1  | 0.0041    | 0.00409 | 0.1413  | 0.00086 | 0.933     |
| Residuals                  | 89 | 2.5771    | 0.02896 |         | 0.54163 |           |
| Total                      | 93 | 4.7581    |         |         | 1       |           |

**Table S26.** Summary results of pairwise permutation MANOVA with false discovery rate adjustment (FDR) for *Trapezia cymodoce* experiment 1. Letters: (D) day; (N) night; (S) small; (M) medium; (L) large; (pr) with the presence of large *T. cymodoce*; (ab) with the absence of large *T. cymodoce*.

| <i>T. cymodoce</i> —Experiment 1: All Sizes Together (Medium and Small) |        |        |        |        |        |        |        |        |        |
|-------------------------------------------------------------------------|--------|--------|--------|--------|--------|--------|--------|--------|--------|
|                                                                         | D-L-pr | D-M-ab | D-M-pr | D-S-ab | D-S-pr | N-L-pr | N-M-ab | N-M-pr | N-S-ab |
| D-M-ab                                                                  | 0.0012 | -      | -      | -      | -      | -      | -      | -      | -      |
| D-M-pr                                                                  | 0.0012 | 0.0856 | -      | -      | -      | -      | -      | -      | -      |
| D-S-ab                                                                  | 0.0012 | 0.0012 | 0.0371 | -      | -      | -      | -      | -      | -      |
| D-S-pr                                                                  | 0.0012 | 0.0012 | 0.0323 | 0.9552 | -      | -      | -      | -      | -      |
| N-L-pr                                                                  | 0.2518 | 0.0012 | 0.0012 | 0.0012 | 0.0012 | -      | -      | -      | -      |
| N-M-ab                                                                  | 0.0012 | 0.0213 | 0.0012 | 0.0012 | 0.0012 | 0.0012 | -      | -      | -      |
| N-M-pr                                                                  | 0.0012 | 0.0134 | 0.0012 | 0.0012 | 0.0012 | 0.0012 | 0.9552 | -      | -      |
| N-S-ab                                                                  | 0.0012 | 0.0012 | 0.0012 | 0.0012 | 0.0012 | 0.0012 | 0.0012 | 0.0012 | -      |
| N-S-pr                                                                  | 0.0012 | 0.0012 | 0.0012 | 0.0012 | 0.0012 | 0.0012 | 0.0012 | 0.0012 | 1      |

**Table S27.** Summary results of pairwise permutation MANOVA with false discovery rate adjustment (FDR) for *Trapezia cymodoce* experiment 2. Letters: (D) day; (N) night; (M) medium; (L) large; (pr) with the presence of large *T. cymodoce*; (ab) with the absence of large *T. cymodoce*.

| <i>T. cymodoce</i> —Experiment 2: Large with Medium Size |        |        |        |        |        |
|----------------------------------------------------------|--------|--------|--------|--------|--------|
|                                                          | D-L-pr | D-M-ab | D-M-pr | N-L-pr | N-M-ab |
| D-M-ab                                                   | 0.0012 | -      | -      | -      | -      |
| D-M-pr                                                   | 0.0012 | 0.2957 | -      | -      | -      |
| N-L-pr                                                   | 0.03   | 0.0012 | 0.0012 | -      | -      |
| N-M-ab                                                   | 0.0012 | 0.0012 | 0.0012 | 0.0012 | -      |
| N-M-pr                                                   | 0.0012 | 0.0012 | 0.0012 | 0.0012 | 1      |

**Table S28.** Summary results of pairwise permutation MANOVA with false discovery rate adjustment (FDR) for *Trapezia cymodoce* experiment 3. Letters: (D) day; (N) night; (S) small; (L) large; (pr) with the presence of large *T. cymodoce*; (ab) with the absence of large *T. cymodoce*.

| <i>T. cymodoce</i> —Experiment 3: Large with Small Size |        |        |        |        |        |
|---------------------------------------------------------|--------|--------|--------|--------|--------|
|                                                         | D-L-pr | D-S-ab | D-S-pr | N-L-pr | N-S-ab |
| D-S-ab                                                  | 0.0012 | -      | -      | -      | -      |
| D-S-pr                                                  | 0.0012 | 0.3889 | -      | -      | -      |
| N-L-pr                                                  | 0.0081 | 0.0012 | 0.0012 | -      | -      |
| N-S-ab                                                  | 0.0012 | 0.0012 | 0.0012 | 0.0012 | -      |
| N-S-pr                                                  | 0.0012 | 0.0012 | 0.0012 | 0.0012 | 0.592  |

**Table S29.** Summary results of pairwise permutation MANOVA with false discovery rate adjustment (FDR) for experiment 4. Letters: (D) day; (N) night; (M) *T. digitalis* medium; (L) *T. cymodoce* large; (pr) with the presence of large *T. cymodoce*; (ab) with the absence of large *T. cymodoce*.

| Experiment 4: <i>T. cymodoce</i> Large with <i>T. digitalis</i> Medium Size |        |        |        |        |        |
|-----------------------------------------------------------------------------|--------|--------|--------|--------|--------|
|                                                                             | D-L-pr | D-M-ab | D-M-pr | N-L-pr | N-M-ab |
| D-M-ab                                                                      | 0.0017 | -      | -      | -      | -      |
| D-M-pr                                                                      | 0.0017 | 0.003  | -      | -      | -      |
| N-L-pr                                                                      | 0.0041 | 0.0017 | 0.0017 | -      | -      |
| N-M-ab                                                                      | 0.0017 | 1      | 0.0017 | 0.0017 | -      |
| N-M-pr                                                                      | 0.0017 | 0.0519 | 0.005  | 0.0017 | 0.0568 |

**Table S30.** Summary results of pairwise permutation MANOVA with false discovery rate adjustment (FDR) for experiment 4. Letters: (D) day; (N) night; (S) *T. digitalis* small; (L) *T. cymodoce* large; (pr) with the presence of large *T. cymodoce*; (ab) with the absence of large *T. cymodoce*.

| Experiment 5: <i>T. cymodoce</i> Large with <i>T. digitalis</i> Small Size |        |        |        |        |        |
|----------------------------------------------------------------------------|--------|--------|--------|--------|--------|
|                                                                            | D-L-pr | D-S-ab | D-S-pr | N-L-pr | N-S-ab |
| D-S-ab                                                                     | 0.0017 | -      | -      | -      | -      |
| D-S-pr                                                                     | 0.0017 | 0.5743 | -      | -      | -      |
| N-L-pr                                                                     | 0.0062 | 0.0027 | 0.0017 | -      | -      |
| N-S-ab                                                                     | 0.0017 | 0.0017 | 0.0017 | 0.0017 | -      |
| N-S-pr                                                                     | 0.0017 | 0.0027 | 0.0346 | 0.0017 | 0.583  |

**Table S31.** Summary results for three experiments testing *Trapezia cymodoce* feeding behavior (Reaction and Predation) between different coral structures and between large and medium crabsizes. Experiment: with live corals; with coral skeletons; and (None) without corals; Sample – crab participant number; Outcome were defended as (1/0) Success/Failure, respectfully.

| Experiment | Sample | <i>Trapezia</i> size | Reaction | Predation |
|------------|--------|----------------------|----------|-----------|
| Live coral | L1L    | L                    | 1        | 1         |
| Live coral | L2L    | L                    | 1        | 1         |
| Live coral | L3L    | L                    | 1        | 1         |
| Live coral | L4L    | L                    | 1        | 1         |
| Live coral | L5L    | L                    | 1        | 1         |
| Live coral | L6L    | L                    | 1        | 0         |
| Live coral | L7L    | L                    | 1        | 1         |
| Live coral | L8L    | L                    | 1        | 1         |
| Live coral | L9L    | L                    | 1        | 1         |

---

|                |      |   |   |   |
|----------------|------|---|---|---|
| Live coral     | L10L | L | 1 | 1 |
| Live coral     | L11L | L | 1 | 1 |
| Live coral     | L12L | L | 1 | 1 |
| Live coral     | L13L | L | 1 | 1 |
| Live coral     | L14L | L | 1 | 1 |
| Live coral     | L15L | L | 1 | 1 |
| Live coral     | L16L | L | 1 | 1 |
| Live coral     | L17L | L | 1 | 1 |
| Live coral     | L18L | L | 1 | 1 |
| Live coral     | L19L | L | 1 | 1 |
| Live coral     | L20L | L | 1 | 1 |
| Live coral     | L21L | L | 1 | 1 |
| Live coral     | L22L | L | 1 | 1 |
| Live coral     | L1M  | M | 1 | 1 |
| Live coral     | L2M  | M | 1 | 1 |
| Live coral     | L3M  | M | 1 | 1 |
| Live coral     | L4M  | M | 1 | 1 |
| Live coral     | L5M  | M | 1 | 0 |
| Live coral     | L6M  | M | 1 | 1 |
| Live coral     | L7M  | M | 1 | 0 |
| Live coral     | L8M  | M | 1 | 1 |
| Live coral     | L9M  | M | 1 | 1 |
| Live coral     | L10M | M | 1 | 1 |
| Live coral     | L11M | M | 1 | 1 |
| Live coral     | L12M | M | 1 | 1 |
| Live coral     | L13M | M | 1 | 1 |
| Live coral     | L14M | M | 1 | 1 |
| Live coral     | L15M | M | 1 | 1 |
| Live coral     | L16M | M | 1 | 1 |
| Coral skeleton | S1L  | L | 1 | 1 |
| Coral skeleton | S2L  | L | 1 | 1 |
| Coral skeleton | S3L  | L | 1 | 1 |
| Coral skeleton | S4L  | L | 1 | 1 |
| Coral skeleton | S5L  | L | 1 | 1 |
| Coral skeleton | S6L  | L | 1 | 0 |
| Coral skeleton | S7L  | L | 1 | 1 |
| Coral skeleton | S8L  | L | 1 | 1 |
| Coral skeleton | S9L  | L | 0 | 1 |
| Coral skeleton | S10L | L | 1 | 1 |
| Coral skeleton | S11L | L | 1 | 1 |
| Coral skeleton | S12L | L | 1 | 1 |
| Coral skeleton | S13L | L | 1 | 1 |

|                |      |   |   |   |
|----------------|------|---|---|---|
| Coral skeleton | S14L | L | 1 | 1 |
| Coral skeleton | S15L | L | 1 | 1 |
| Coral skeleton | S16L | L | 1 | 1 |
| Coral skeleton | S17L | L | 1 | 1 |
| Coral skeleton | S18L | L | 1 | 1 |
| Coral skeleton | S19L | L | 1 | 1 |
| Coral skeleton | S20L | L | 1 | 1 |
| Coral skeleton | S21L | L | 1 | 1 |
| Coral skeleton | S22L | L | 1 | 1 |
| Coral skeleton | S1M  | M | 1 | 0 |
| Coral skeleton | S2M  | M | 1 | 1 |
| Coral skeleton | S3M  | M | 1 | 1 |
| Coral skeleton | S4M  | M | 1 | 1 |
| Coral skeleton | S5M  | M | 1 | 1 |
| Coral skeleton | S6M  | M | 1 | 1 |
| Coral skeleton | S7M  | M | 1 | 0 |
| Coral skeleton | S8M  | M | 1 | 1 |
| Coral skeleton | S9M  | M | 1 | 1 |
| Coral skeleton | S10M | M | 1 | 1 |
| Coral skeleton | S11M | M | 1 | 1 |
| Coral skeleton | S12M | M | 1 | 1 |
| Coral skeleton | S13M | M | 1 | 1 |
| Coral skeleton | S14M | M | 1 | 1 |
| Coral skeleton | S15M | M | 1 | 1 |
| Coral skeleton | S16M | M | 1 | 1 |
| None           | N1L  | L | 1 | 0 |
| None           | N2L  | L | 1 | 0 |
| None           | N3L  | L | 0 | 0 |
| None           | N4L  | L | 0 | 0 |
| None           | N5L  | L | 1 | 0 |
| None           | N6L  | L | 1 | 0 |
| None           | N7L  | L | 1 | 0 |
| None           | N8L  | L | 0 | 0 |
| None           | N9L  | L | 0 | 0 |
| None           | N10L | L | 0 | 0 |
| None           | N11L | L | 1 | 0 |
| None           | N12L | L | 1 | 0 |
| None           | N13L | L | 0 | 0 |
| None           | N14L | L | 0 | 0 |
| None           | N15L | L | 0 | 0 |
| None           | N16L | L | 1 | 0 |
| None           | N17L | L | 1 | 0 |

---

|      |      |   |   |   |
|------|------|---|---|---|
| None | N18L | L | 1 | 0 |
| None | N19L | L | 1 | 0 |
| None | N20L | L | 1 | 0 |
| None | N21L | L | 0 | 0 |
| None | N22L | L | 0 | 0 |
| None | N1M  | M | 0 | 0 |
| None | N2M  | M | 0 | 0 |
| None | N3M  | M | 0 | 0 |
| None | N4M  | M | 0 | 0 |
| None | N5M  | M | 0 | 0 |
| None | N6M  | M | 0 | 0 |
| None | N7M  | M | 0 | 0 |
| None | N8M  | M | 0 | 0 |
| None | N9M  | M | 0 | 0 |
| None | N10M | M | 0 | 0 |
| None | N11M | M | 0 | 0 |
| None | N12M | M | 0 | 0 |
| None | N13M | M | 0 | 0 |
| None | N14M | M | 0 | 0 |
| None | N15M | M | 0 | 0 |
| None | N16M | M | 0 | 0 |

---
